1 Plasma proteomics reveals markers of metabolic stress in HIV infected children  
2 with severe acute malnutrition

3  
4 Gerard Bryan Gonzales<sup>1,2\*</sup>, James M Njunge<sup>3,4</sup>, Bonface M Gichuki<sup>3,4</sup>, Bijun Wen<sup>5,6</sup>, Isabel  
5 Potani<sup>3</sup>, Wieger Voskuil<sup>3,7,8</sup>, Robert H J Bandsma<sup>3,5,6</sup>, James A Berkley<sup>3,4,9</sup>

6 1. Department of Gastroenterology, Faculty of Medicine and Health Sciences, Ghent  
7 University, Ghent, Belgium

8 2. VIB Inflammation Research Centre, Ghent, Belgium

9 3. The Childhood Acute Illness & Nutrition (CHAIN) Network, Nairobi, Kenya

10 4. KEMRI/Wellcome Trust Research Programme, Kilifi, Kenya

11 5. Centre for Global Child Health, The Hospital for Sick Children, Toronto, Ontario,  
12 Canada

13 6. Department of Nutritional Sciences, Faculty of Medicine, University of Toronto,  
14 Toronto, Canada

15 7. Global Child Health Group, Emma Children's Hospital, Amsterdam University  
16 Medical Centres, Amsterdam, the Netherlands

17 8. Amsterdam Institute for Global Health and Development, Department of Global  
18 Health, Amsterdam University Medical Centres, Amsterdam, The Netherlands

19 9. Centre for Tropical Medicine & Global Health, Nuffield Department of Medicine,  
20 University of Oxford, Oxford, UK

21

22 \*Correspondence to:

23 Gerard Bryan Gonzales, PhD

24 Email: Gerard.gonzales@ugent.be

25 **Abstract (word count = 195)**

26

27 HIV infection affects up to 30% of children presenting with severe acute malnutrition (SAM)  
28 in Africa and is associated with increased mortality. Children with SAM are treated similarly  
29 regardless of HIV status, although mechanisms of nutritional recovery in HIV and/or SAM  
30 are not well understood. We performed a secondary analysis of a clinical trial and plasma  
31 proteomics data among children with complicated SAM in Kenya and Malawi. Compared to  
32 children with SAM without HIV (n = 113), HIV-infected children (n = 54) had evidence  
33 (false discovery rate (FDR) corrected  $p < 0.05$ ) of metabolic stress, including enriched  
34 pathways related to inflammation and lipid metabolism. Moreover, we observed reduced  
35 plasma levels of zinc- $\alpha$ -2-glycoprotein, butyrylcholinesterase, and increased levels of  
36 complement C2 resembling findings in metabolic syndrome, diabetes and other non-  
37 communicable diseases. HIV was also associated (FDR corrected  $p < 0.05$ ) with higher plasma  
38 levels of inflammatory chemokines. Considering evidence of biomarkers of metabolic stress,  
39 it is of potential concern that our current treatment strategy for SAM regardless of HIV status  
40 involves a high-fat therapeutic diet. The results of this study suggest a need for clinical trials  
41 of therapeutic foods that meet the specific metabolic needs of children with HIV and SAM.

42

43 **Keywords:** HIV, SAM, lipid metabolism, molecular nutrition

44 **Introduction**

45 Malnutrition, specifically undernutrition in all its forms, remains a global public health burden  
46 that accounts for 45% of all death among children under 5 years old <sup>1</sup>. Despite careful  
47 monitoring and adherence to guidelines set by the World Health Organization, whilst in  
48 general, uncomplicated SAM cases treated in the community do well, up to 25% of children  
49 with complicated severe acute malnutrition (SAM) treated in a hospital environment do not  
50 survive <sup>2-5</sup>. Furthermore, about one in five children treated for complicated SAM and  
51 discharged alive, die in the first year after discharge in low-resource settings <sup>6-8</sup>. However, our  
52 understanding of the pathophysiology underlying the poor prognosis for these children is  
53 surprisingly limited.

54

55 Infection with the human immunodeficiency virus (HIV) is a common co-morbidity of SAM  
56 in sub-Saharan Africa affecting up to 30% of admissions among SAM cases <sup>9</sup>. HIV-infected  
57 or exposed children are significantly more likely to be stunted, wasted, and underweight <sup>10</sup>.  
58 They also more often present with other clinical complications and greater susceptibility to  
59 infections, thus further complicating their clinical management, which may include providing  
60 more aggressive antimicrobial therapy and higher caloric nutritional intervention <sup>11</sup>.  
61 Moreover, response to clinical management is also less predictable and less well-understood  
62 in HIV-infected children compared to their uninfected counterparts <sup>12</sup>. Although acute  
63 opportunistic infections play a key role in the outcome of these children, intestinal pathology  
64 including inflammation and malabsorption, and metabolic perturbations may also be present.  
65 However, mechanisms driving poor nutritional recovery of children with HIV even when  
66 detected co-morbidities are treated remain poorly understood <sup>12</sup>.

67

68 We hypothesised that inflammatory, metabolic and other pathways which are likely to be  
69 involved in the response to infection, survival and nutritional recovery differ between children  
70 with SAM with and without HIV. We conducted a secondary analysis of clinical data and  
71 biological samples from a randomised clinical trial in Kenya and Malawi <sup>13</sup>.

72

## 73 **Results**

### 74 **Patient characteristics**

75 Table 1 presents the baseline characteristics of the children in the randomised trial. A total of  
76 843 complicated SAM children were recruited for the randomised trial, of which 179 (22%)  
77 patients were HIV(+). Age was higher and MUAC was lower in HIV(+) children than HIV(-)  
78 counterparts. Most HIV cases were found in Malawi. Sex and the presence of oedema were  
79 not associated with HIV status. Mortality was more than 2 times higher among in HIV(+)  
80 compared to HIV(-) ( $p < 0.001$ ). Children whose HIV status were unknown had the highest  
81 mortality of 34%, which indicates bias due to frequent death before testing could be  
82 undertaken or refusal of testing when a child was more severely ill.

83

84 Among HIV(+), 33% were already receiving an anti-retroviral treatment (ART) regime:  
85 53/179 (30%) on highly active antiretroviral therapy (HAART), and 7/179 (4%) on  
86 Nevirapine only. About half of the children (90/179) were naïve for ART whereas HIV  
87 treatment status was unknown for 16% (29/179). Mortality was not significantly different  
88 among children on HAART, ART naïve and children with unknown HIV treatment status  
89 (Supplementary Table 1).

90

91 **HIV is associated with increased inflammatory and immune response, dysregulated lipid**  
92 **metabolism, and increased proteolysis in children with SAM**

93 Among the children included in the proteomics study, 54 were HIV (+) and 113 were HIV(-)  
94 (Table 2). In this sub-population, age, sex and the presence of oedema were not significantly  
95 associated with HIV. HIV(+) children also had significantly lower MUAC and higher  
96 mortality than HIV(-) children.

97

98 A total of 204 circulating proteins were annotated and compared between children with and  
99 without HIV infection. Of these, levels of 42 proteins were found to be significantly  
100 associated with HIV status in the initial univariate analysis (Figure 1A) (Supplementary Table  
101 2). Specifically, HIV(+) was associated with higher circulating levels of immunoglobulins,  
102 inflammatory proteins such as calprotectin (S100 calcium binding protein A8 and S100  
103 calcium binding protein A9), complement proteins, and proteins related to host response to  
104 infection (i.e. lipopolysaccharide binding protein, galectin 3 binding protein and CD5  
105 molecule-like protein). Enrichment analysis suggested that HIV(+) children had increased  
106 complement activation and immune response, and inflammatory responses than HIV(-)  
107 children. Neutrophil aggregation and chemokine production appeared to be the pathways most  
108 highly enriched in HIV(+) compared to HIV(-) SAM children. To substantiate these results,  
109 we quantified chemokine and cytokine levels in plasma. As shown, most chemokines had the  
110 tendency to be associated with HIV infection, where elevated plasma concentration of 12  
111 were significantly associated with HIV status in SAM children (Figure 1B), namely:  
112 monocyte chemoattractant protein 1 (MCP1), macrophage inflammatory protein 1 beta  
113 (MIP1b, CCL4), granulocyte colony-stimulating factor (GCSF), interleukin 1 beta (IL1b),  
114 tumour necrosis factor alpha (TNFa), interleukins 2,5,7, 8 and 15 (IL2 , 5, 7, 8, 15),  
115 interleukin 12 subunit beta (IL12p40), interferon gamma-induced protein 10 (IP-10), and  
116 interleukin-1 receptor antagonist (IL-1RA).

117

118 Out of the 43 differentially expressed proteins, three proteins were found to be negatively  
119 associated with HIV status on initial univariate analysis, namely: adiponectin, kininogen-1  
120 and peptidase inhibitor 16. Among HIV(+) children, there were no statistically significant  
121 associations with receiving HAART (n = 53) compared to ART naïve (n = 90) children (data  
122 not shown), recognising our study was not powered for this comparison. Furthermore,  
123 sensitivity analysis to address the possibility of HIV maternal antibodies in younger children,  
124 showed no significant interaction of age above or below 18 months and individual proteins  
125 plasma levels towards HIV status, although power to detect was limited.

126

127 The weighted EN model extracted 73 circulating proteins (Figure 2A) that are associated with  
128 HIV status with AUROC = 0.97 [95% CI: 0.95 – 0.99] (Figure 2B) and misclassification error  
129 rate of 2.4%. Optimism-adjusted validated AUROC after bootstrapping was 0.90 [95% CI:  
130 0.90 – 0.902], indicating a robust model. Pathway enrichment analysis highlighted that apart  
131 from increased immune response, HIV(+) children with SAM had increased proteolysis and  
132 lipid mobilisation, specifically increased very low-density lipoprotein assembly, indicating  
133 metabolic dysregulation related to cholesterol and triglyceride metabolism among HIV(+)  
134 patients (Figure 2D).

135

136 After 2000 bootstrap iterations during bootstrap validation, 3 proteins were consistently  
137 extracted by the EN model >80% of the time (Figure 2D), namely: butyrylcholinesterase  
138 (BChE), complement C2 and zinc- $\alpha$ -2-glycoprotein (ZAG), indicating that these 3 proteins  
139 are likely to be the most important features associated with HIV in children with complicated  
140 SAM. Weighted logistic regression model of these 3 proteins showed good discrimination of  
141 HIV status (AUROC = 0.80 [95% CI: 0.74 – 0.87]) (Figure 2E).

142

## 143 **Discussion**

144 In this study, we report plasma proteomic differences associated with HIV status, suggesting  
145 that HIV imposes additional metabolic and inflammatory insults among HIV(+) children with  
146 SAM. Our results show that pathways involved in inflammatory response, complement  
147 cascade activation and lipid metabolism dysregulation are associated with HIV status.  
148 Circulating levels of several plasma chemokines were also found to be higher in HIV(+)  
149 among children with SAM. Greater inflammatory responses in these children could be related  
150 to the higher inpatient mortality of HIV(+) compared to HIV(-) children with SAM.

151

152 An earlier metabolomics study in Uganda reported reduced serum levels of adiponectin and  
153 leptin, whereas serum triglycerides, ketones and even-chain acylcarnitines were higher in  
154 HIV(+) children with SAM indicating perturbed lipid metabolism<sup>14</sup>. Our current study  
155 therefore concurs with this finding, as we also found reduced plasma levels of adiponectin in  
156 HIV(+) SAM children compared to HIV(-) SAM children, along with upregulation of  
157 pathways involved in lipid transport and metabolism, specifically very low-density lipoprotein  
158 assembly.

159

160 Using optimism-adjusted bootstrap validation of the EN model, we found 3 proteins:  
161 complement c2, BChE and ZAG robustly distinguished HIV(+) from HIV(-) in children with  
162 SAM, demonstrating the ability of multivariate analysis techniques, such as EN, to uncover  
163 underlying relationships between protein markers which would be difficult to identify when  
164 analysed individually. The activation of the complement system during HIV infection has  
165 been previously discussed at length, which is associated with the increased cellular invasion  
166 of HIV in cells<sup>15-17</sup>.

167

168 On the other hand, BChE is a protein synthesized in the liver and abundant in plasma, which  
169 hydrolyses acetylcholine. Although very similar to its sister protein, acetylcholinesterase,  
170 biological functions of BChE appear to be more varied but less understood <sup>18</sup>. In a recent  
171 study in China, low circulating BChE was found to be highly associated with HIV severity,  
172 was predictive of mortality in adults, and was proposed as a plausible strategy for severity  
173 classification among adults with HIV <sup>19</sup>. BChE is also reported to be reduced in SAM, stress  
174 and inflammation <sup>20</sup>. In animal studies, BChE deficiency was found to strongly affect fat  
175 metabolism and promotes hepatic lipid accumulation <sup>21</sup>. Serum BChE levels have been found  
176 to have a significant negative correlation with serum total cholesterol and serum low-density-  
177 lipoprotein cholesterol among people with diabetes mellitus <sup>22</sup>.

178

179 ZAG is a newly characterized adipokine that is involved in lipolysis, body weight regulation  
180 and may also be involved in the development of insulin resistance <sup>23</sup>. Reduction in plasma  
181 levels of ZAG was previously reported to be implicated in dyslipidaemia in HIV(+) adults  
182 under ART treatment <sup>23</sup>. Reduced circulating levels of ZAG has also been found among adults  
183 with clinically diagnosed metabolic syndrome, based on guidelines of the United States  
184 National Cholesterol Education Program (NCEP) Expert Panel Adult Treatment Panel (ATP)  
185 III criteria <sup>24</sup>. Serum ZAG levels have been reported lower among adults with impaired  
186 glucose tolerance and type 2 diabetes mellitus <sup>25</sup>. Taken together, our results therefore suggest  
187 that children with both HIV and SAM manifest hallmarks of metabolic stress similar to those  
188 occurring in metabolic syndrome and other non-communicable diseases (NCD).

189

190 This study is the first proteomics investigation on the interaction between HIV and SAM. In  
191 summary, our results, which together with the previously published metabolomics study <sup>14</sup>,  
192 strengthens evidence on the increased metabolic stress and altered metabolic response among



193 children living with both HIV and SAM. Our results also concur with previous studies that  
194 reported elevated metabolic stress among non-malnourished adults living with HIV leading to  
195 increased prevalence or risk for metabolic syndrome, cardiovascular diseases, diabetes and  
196 other non-communicable diseases <sup>26-32</sup>.

197

198 Metabolic abnormalities have previously been reported to be attributed HAART use among  
199 HIV(+) patients <sup>33</sup>. In a recent systematic review, use of 2 classes of HAART, protease  
200 inhibitors and nonnucleoside reverse transcriptase inhibitors, has been found to be associated  
201 with abnormalities in plasma lipid profiles <sup>34</sup>. However, dysregulation in lipid metabolism has  
202 also been reported in HAART-naïve patients, which indicates that HIV infection alone cause  
203 lipid metabolism perturbations. An earlier longitudinal study of 50 men in the USA reported  
204 notable declines in serum total cholesterol after HIV infection compared to results of blood  
205 analysis from last seronegative visit. Large increases in total cholesterol and low-density  
206 lipoproteins (LDL) were detected after HAART initiation <sup>35</sup>. However, many other studies  
207 reported increases in total cholesterol among HIV-infected patients naïve to HAART. For  
208 instance, in a study of ART-naïve HIV-infected adults in Ethiopia, malnutrition and lipid  
209 abnormalities (specifically total cholesterol) were associated with CD4+ T cell counts <sup>36</sup>. In in  
210 vitro studies, transfection of a T-cell (RH9) with HIV led to the enhanced production of free  
211 fatty acids and LDL <sup>37</sup>. Furthermore, monocytes isolated from HIV-infected patients both  
212 taking HAART and HAART-naïve, were found to have altered expression patterns of receptors  
213 linked with lipid metabolism (i.e. FXR, PXR, PPAR $\alpha$ , GR, RAR $\alpha$  and RXR) compared to  
214 monocytes of HIV-uninfected controls <sup>38</sup>. For our study however, we are unable to ascertain  
215 whether the lipid metabolism dysregulation we observed is due primarily on the viral load  
216 itself or the use of HAART due to lack of power for this sub-analysis. Majority of the  
217 participants subjected to proteomics analysis were HAART-naïve (50%), where 26% were on

218 HAART, 6% were on Nevirapine alone and we had no data on treatment of 18% of the  
219 patients (Table 2). In all these studies cited, authors argue to need for monitoring of lipid  
220 profiles in HIV-infected populations. Hence, lipid monitoring may also inform nutritional and  
221 clinical recovery of children with SAM and HIV and could be implemented to improve  
222 clinical care for these children.

223

224 However, despite our knowledge that HIV-infected populations have altered metabolic  
225 requirements compared to HIV-uninfected counterparts, WHO guidelines for the nutritional  
226 management for SAM are globally the same regardless of HIV status, which is summarized in  
227 Table 3<sup>39</sup>. Nutritional management for in-patient children with SAM involves provision of a  
228 low-protein, low-fat milk-based food, F75, every three hours. F75 is used during clinical  
229 stabilization occurring during the first few days after admission and is not intended for weight  
230 gain. Once the children are clinically stabilized and are able to tolerate the milk/solute load,  
231 children are transitioned to F100, a higher-calorie, high-fat milk intended to boost weight gain  
232 or to Ready-to-Use Therapeutic Food (RUTF), a peanut-based calorie-dense diet. Upon  
233 discharge from in-patient care, children are referred to community based nutritional  
234 therapeutic centres where they are provided with RUTF on a 2 weekly basis.

235

236 Considering evidence of biomarkers of metabolic syndrome and NCD in HIV(+) children  
237 with SAM, it is of potential concern that our current treatment strategy involves a high-fat  
238 therapeutic diet. About 50% of much needed calories during the growth catch-up phase are  
239 supplied as lipids, which HIV(+) children may not be able to efficiently assimilate.  
240 Alterations in lipid metabolism in HIV(+) children with SAM may also mean that the high  
241 amounts of dietary lipids could be deposited as ectopic fat in the liver and muscle,  
242 predisposing to insulin resistance, diabetes, cardiovascular problems and other NCDs later in

243 life. Although long-term metabolic follow-up studies could be done for HIV(+) children  
244 previously treated for either complicated and uncomplicated SAM, significant barriers are the  
245 high mortality rate in earlier studies of HIV(+) children with SAM, cost and difficulty tracing  
246 them years later. The results of this study indicate a need for clinical trials of F100 or RUTF  
247 modified to meet the expected metabolic needs of HIV(+) children with SAM. This could  
248 initially be done in relatively small groups with outcomes that include measuring metabolic  
249 stress.

250

251 Several studies on nutritional intervention strategies among HIV-infected adults have been  
252 reported. For instance, a study in the USA showed that dietary fat intake, specifically  
253 saturated fats, was significantly associated with hypertriglyceridemia among HIV-infected  
254 adults (18 – 60 years)<sup>40</sup>. Moreover, in a preclinical model, high saturated fat consumption  
255 was found to accelerate immunodeficiency virus disease progression in macaques, specifically  
256 increased mortality hazard and circulating levels of pro-inflammatory cytokines, especially  
257 IL8<sup>41</sup>, which has been previously reported to be associated with lipodystrophy among HIV  
258 patients<sup>42</sup>. In our study, we also found a significant association between high plasma IL8  
259 concentration and HIV in SAM children. Hence, modifying the saturated fat composition of  
260 the milk-based F75 and F100 could potentially lower metabolic stress.

261

262 The European Society for Parenteral and Enteral Nutrition (ESPEN) have given a grade A  
263 recommendation for the use of medium-chain triglyceride (MCT)-based diet on HIV(+)  
264 patients with diarrhoea and severe undernutrition in its 2006 ESPEN Guidelines on Enteral  
265 Nutrition<sup>43</sup>. Grade A recommendations are given to strategies based on meta-analysis or at  
266 least one randomised control trial. In this case, the recommendation was based on a  
267 prospective, randomized double-blind comparative trial on 24 adult patients with HIV and

268 diarrhoea of more than 4-wk duration, fat malabsorption, and loss of 10–20% of ideal body  
269 weight<sup>44</sup>. In this study, the authors found improved outcomes from diarrhoea and fat  
270 malabsorption from MCT than long-chain triglyceride-based diet among HIV(+) adults.

271

272 Lastly, the long-term metabolic effect of nutritional intervention strategies for SAM still  
273 remains unresolved. Most specifically, the potential metabolic stress associated with the rapid  
274 weight gain during the nutritional rehabilitation phase after SAM and its implications on  
275 nutritional outcomes during adulthood demands urgent research attention, especially for  
276 HIV(+) children with SAM.

277

278 Limitations of this study include absence of data on viral load and CD4+ counts of the  
279 patients, which could provide a deeper understanding of the results. Furthermore, in this  
280 study, we did not find association between oedematous malnutrition and HIV status, although  
281 several studies have found higher HIV prevalence among non-oedematous children with  
282 SAM<sup>45-47</sup>. In our study however, we found high in-patient mortality rate (16/46, 34%) among  
283 children with unknown HIV status, where 39/46 (85%) had non-oedematous SAM.  
284 Considering the high rate of mortality, these children may have been HIV(+). This highlights  
285 the need for earlier HIV screening among children with SAM.

286

## 287 **Conclusion**

288 Plasma proteomics reveals that HIV(+) children with SAM manifest hallmarks of metabolic  
289 stress similar to those observed in non-communicable diseases. This could be related to the  
290 poor nutritional recovery and high mortality of HIV(+) children with SAM despite clinical  
291 and nutritional intervention. The results of this study indicate a need for clinical trials  
292 modifying the composition of F100 or RUTF to meet the specific metabolic needs of HIV(+)

293 children with SAM during rehabilitation phase. This could initially be done in relatively small  
294 groups with outcomes that include measuring metabolic stress.

295

## 296 **Methods**

### 297 **Patient recruitment and study design**

298 This is a secondary analysis of a nested case control study from a randomised controlled trial  
299 (NCT02246296), which tested the effect of a lactose-free, low-carbohydrate F75 milk to limit  
300 carbohydrate malabsorption, diarrhoea and refeeding syndrome among children hospitalized  
301 for complicated SAM at Queen Elizabeth Central Hospital in Blantyre, Malawi, Kilifi County  
302 Hospital and Coast General Hospital, Mombasa, Kenya <sup>13</sup>. Children aged 6 months to 13  
303 years were eligible for enrolment into the trial at admission to hospital if they had SAM,  
304 defined as: mid-upper arm circumference (MUAC) <11.5cm or weight-for-height Z score <-3  
305 if younger than 5 years of age, BMI Z score <-3 if older than 5 years, or oedematous  
306 malnutrition at any age and had medical complications or failing an appetite test, as defined  
307 by WHO guidelines <sup>48</sup>. Children were excluded if they had a known allergy to milk products  
308 and did not provide consent. Biological samples were obtained before the children received  
309 the randomised treatment irrespective of HIV status. Unless a child's HIV positive status was  
310 documented, HIV status was assessed by offering an antibody test at admission plus  
311 appropriate counseling. For this analysis, patients that tested positive on an HIV antibody test  
312 were considered HIV(+) and children with missing or declined HIV test were excluded.

313

314 The nested case-control study was designed to investigate inpatient mortality for which  
315 proteomic, cytokine, and chemokine data was generated using plasma samples collected at  
316 admission during enrolment to the trial. To compare the proteomic profiles between HIV  
317 affected and non-affected children with SAM, we used data from a nested case-control study

318 to investigate inpatient mortality during the trial including 79 deaths and 88 children that were  
319 clinically stabilized and discharged from the hospital matched by site of recruitment. For this  
320 analysis, all observations from the proteomics dataset were included and the analysis was  
321 designed to help overcome selection bias, as given in detail below.

322

### 323 **Proteomics, cytokine and chemokine analysis**

324 Untargeted proteomics and targeted cytokines and chemokines analysis of plasma samples  
325 were performed following methods described previously<sup>49</sup>. The targeted protein panel  
326 included: epidermal growth factor (EGF); eotaxin; granulocyte-colony stimulating factor  
327 (GCSF); granulocyte-macrophage colony-stimulating factor (GMCSF); interferon alpha-2  
328 (IFNa2); interferon gamma (IFNg); interleukins 10, 12p40, 12p70, 13, 15, 17A, 1a, 1b, 1RA,  
329 2 to 8; interferon gamma-induced protein 10 (IP10); monocyte chemoattractant protein 1  
330 (MCP1), macrophage inflammatory protein 1 alpha and beta (MIP1a & b); tumour necrosis  
331 factor alpha (TNFa) and beta (TNFb); and vascular endothelial growth factor (VEGF).

332

### 333 **Data analysis**

334 Data analyses were performed using R v3.5<sup>50</sup>. Analysis of the prevalence of HIV(+),  
335 nutritional status and their associations with inpatient mortality utilised the entire trial dataset  
336 (N=843). Analysis of categorical data was performed using Fisher's test and generalised  
337 linear models for continuous outcomes. Logistic regression was used to analyse binary  
338 outcomes adjusting for age, sex, presence of oedema, and site of recruitment. These  
339 associations were also adjusted for MUAC. As a sensitivity analysis to address the possibility  
340 of confounding due to HIV maternal antibodies in younger children, a test of interaction  
341 between age above or below 18 months and individual proteins towards HIV status was  
342 performed.

343

344 The proteomics, cytokines and chemokines analyses were secondary analyses of data  
345 collected from a nested case-control study with inpatient mortality as its primary outcome,  
346 hence with strong selection bias. The analysis for the association between HIV status and  
347 individual proteins was therefore performed using logistic regression analysis with inverse  
348 probability weighting (IPW) to correct for selection bias<sup>51-54</sup>. Weights ( $w$ ) were calculated as  
349 suggested by Samuelsen<sup>52</sup> wherein the weight for each observation selected into the nested  
350 case-control study was computed as the inverse of the probability of being selected for the  
351 nested study from the main clinical trial. The probability of inclusion was therefore calculated  
352 as:

353

$$354 \quad p(i) = \frac{1}{1 + e^{-(\beta_0 + \beta_1 x_1 + \beta_2 x_2 \dots + \beta_n x_n)}};$$

355 where  $p(i)$  is the probability of inclusion in the nested case-control study and  $x_1, x_2 \dots x_n$  are  
356 HIV status, sex, age, presence of oedema, mid-upper arm circumference, and site of  
357 recruitment of the  $i$ -th observation (child) based on the entire trial population. Inverse  
358 probability weight is therefore:

359

$$360 \quad w(i) = \frac{1}{p(i)}$$

361

362 Differences in individual proteins abundances were considered statistically significant when  
363  $p < 0.05$  after adjustment for multiple comparisons using Benjamini-Hochberg false discovery  
364 rate (FDR)<sup>55</sup>.

365

366 Multivariate analysis was undertaken in order to determine several proteins that are  
367 collectively associated with HIV status, some of which may not be significantly associated to

368 HIV independently. This was performed using a weighted elastic net (EN) model  
369 implemented using the “glmnet” package in R<sup>56</sup>. EN is a penalized regression approach that  
370 was developed to help overcome problems caused by high dimensional data. It is an  
371 integration of two regularized approaches, ridge regression and least absolute shrinkage and  
372 selection operator (LASSO), wherein the contribution of each of these models to the final EN  
373 model is controlled by the  $\alpha$  parameter<sup>56,57</sup>. The strong penalization imposed by LASSO  
374 draws coefficients to zero thereby eliminating non-predictive proteins features, whereas ridge  
375 regression addresses potential multi-collinearity problems in high-dimensional data<sup>56,57</sup>.

376

377 Weighted EN model generation was performed with HIV status as outcome, protein profile as  
378 predictors, and  $w$  as observation weights. The penalization parameter lambda, which  
379 influences the shrinkage of variable coefficients to zero thus eliminating some non-  
380 contributing variables, was determined by estimating the area under the receiver operator  
381 curve (ROC) of the population using ten-fold cross validation. Several alpha parameter values  
382 were assessed and a final value of 0.85 was taken to achieve a compromise between  
383 predictive ability and fewer number of features extracted. The final lambda parameter was  
384 based on the value which gave the highest area under the ROC (AUROC) value.

385

386 Proteins with significant association with HIV status after correction for false discovery and  
387 those extracted by the EN model were then uploaded to The Database for Annotation,  
388 Visualization and Integrated Discovery (DAVID) v6.8 Bioinformatics Resource<sup>58</sup> to assess  
389 the Gene ontology (GO) enriched pathways of the differentially expressed proteins.

390

391 EN model validity was judged based on the AUROC and misclassification error rate. The  
392 fitted EN model performance measured as optimism-corrected AUC was validated using



393 bootstrap, following the procedure of Smith et al.<sup>59</sup>. Bootstrapping was performed on 2000  
394 iterations using the “BootValidation” package in R. Protein features extracted at least 80% of  
395 all iterations by the bootstrap EN model were then considered to be the most relevant protein  
396 biomarkers. To test how well these proteins can discriminate HIV status, they were then fitted  
397 on a weighted logistic regression with HIV as outcome.

398

### 399 **Visualisation of significantly enriched GO terms**

400 Bubble plots were used to visualise the significantly enriched pathways ( $p < 0.05$  after  
401 adjustment for FDR) obtained from DAVID. The  $p$ -values in DAVID were obtained using a  
402 modified Fisher’s exact test<sup>60</sup>. The  $y$ -axis represents the fold enrichment which indicates the  
403 magnitude of the enrichment, as calculated in DAVID. Fold enrichment is defined as:

$$404 \quad \text{fold enrichment} = \frac{(m/n)}{M/N},$$

405 where  $m$  is the number of proteins significantly associated with HIV status or proteins  
406 extracted by the EN model that belong to a particular pathway, while  $M$  is the total number of  
407 proteins belonging to the same pathway. Variable  $n$  is the number of all proteins significantly  
408 associated with HIV status or extracted by the EN model and  $N$  is the total number of all  
409 proteins in the human background. Therefore, a fold enrichment of 10 indicates that 10% of  
410 the proteins significantly associated with HIV status belong to a particular pathway, and 1%  
411 of all annotated proteins in the human background belongs to the same pathway<sup>60</sup>. However,  
412 the proponents of this metric warn that big fold enrichments could be obtained from a small  
413 number of proteins, which could be due to small  $n$  or pathways with fewer members.

414

415 The  $x$ -axis on the hand represents the enrichment  $z$ -score for a particular pathway<sup>61</sup>, which is  
416 calculated as follows:

$$417 \quad z - \text{score} = \frac{(up-down)}{\sqrt{count}};$$

418 where *up* is the total number of proteins upregulated, *down* is the total number of proteins  
419 downregulated, and *count* is the total number of proteins in the input which belongs to a  
420 particular pathway. Variables *up* and *down* were based on the weighted logistic regression for  
421 each individual protein. Hence, if 5 proteins belonging to pathway *x* were upregulated and 2  
422 were downregulated, the z-score for pathway *x* would be:  $(5-2)/\sqrt{7} = 1.13$ . A positive z-score  
423 indicates that the particular pathway is overall upregulated in HIV(+), whereas a negative z-  
424 score indicates an overall downregulation<sup>61</sup>.

425

#### 426 **Funding Sources**

427 The original clinical trial was supported by the Thrasher Fund (grant number: 9403), awarded  
428 to JAB. GBG is a postdoctoral fellow of the Research Foundation – Flanders (FWO). The  
429 Ghent University –VLIR-UOS Global Minds Fund supported the travel of GBG to Kenya.  
430 JAB and JMN are currently supported by the Bill & Melinda Gates Foundation within the  
431 Childhood Acute Illness and Nutrition (CHAIN) Network (grant OPP1131320). JAB is  
432 currently supported by the MRC/DfID/Wellcome Trust Joint Global Health Trials scheme  
433 (grant MR/M007367/1). The funders had no role in the design, conduct, analysis, or writing  
434 of this manuscript.

435

#### 436 **Declaration of Interests**

437 The authors declare that we do not have any conflicts of interest.

438

#### 439 **Study approvals**

440 The secondary analyses of the trial were approved by the Kenyan national ethics committee,  
441 KEMRI- SERU (KEMRI/RES/7/3/1). The trial was registered at [clinicaltrials.gov](http://clinicaltrials.gov)  
442 (NCT02246296).

443

#### 444 **Author contributions**

445 GBG, JMN and JAB designed the study and data analysis. JMN and BG performed the  
446 proteomics analysis. GBG performed data analysis. BW, RB, WV, IP and JAB were involved  
447 in the clinical aspects of the study. GBG wrote the initial drafts of the manuscript and all  
448 authors contributed to editing and improving the manuscript.

449

#### 450 **References**

- 451 1 Black, R. E. *et al.* Maternal and child undernutrition and overweight in low-income  
452 and middle-income countries. *The Lancet* **382**, 427-451, doi:10.1016/S0140-  
453 6736(13)60937-X (2013).
- 454 2 Heikens, G. T. *et al.* Case management of HIV-infected severely malnourished  
455 children: challenges in the area of highest prevalence. *Lancet* **371**, 1305-1307,  
456 doi:10.1016/s0140-6736(08)60565-6 (2008).
- 457 3 Irena, A. H., Mwambazi, M. & Mulenga, V. Diarrhea is a Major killer of Children  
458 with Severe Acute Malnutrition Admitted to Inpatient Set-up in Lusaka, Zambia. *Nutr.*  
459 *J.* **10**, 110-110, doi:10.1186/1475-2891-10-110 (2011).
- 460 4 Maitland, K. *et al.* Children with Severe Malnutrition: Can Those at Highest Risk of  
461 Death Be Identified with the WHO Protocol? *PLoS Med.* **3**, e500,  
462 doi:10.1371/journal.pmed.0030500 (2006).
- 463 5 Hossain, M. *et al.* Efficacy of World Health Organization guideline in facility-based  
464 reduction of mortality in severely malnourished children from low and middle income  
465 countries: A systematic review and meta-analysis. *J. Paediatr. Child Health* **53**, 474-  
466 479, doi:10.1111/jpc.13443 (2017).
- 467 6 Kerac, M. *et al.* Follow-Up of Post-Discharge Growth and Mortality after Treatment  
468 for Severe Acute Malnutrition (FuSAM Study): A Prospective Cohort Study. *PLOS*  
469 *ONE* **9**, e96030, doi:10.1371/journal.pone.0096030 (2014).
- 470 7 Berkley, J. A. *et al.* Daily co-trimoxazole prophylaxis to prevent mortality in children  
471 with complicated severe acute malnutrition: a multicentre, double-blind, randomised  
472 placebo-controlled trial. *The Lancet. Global health* **4**, e464-473, doi:10.1016/s2214-  
473 109x(16)30096-1 (2016).
- 474 8 Nemetchek, B. *et al.* Paediatric postdischarge mortality in developing countries: a  
475 systematic review. *BMJ Open* **8**, e023445, doi:10.1136/bmjopen-2018-023445 (2018).
- 476 9 Fergusson, P. & Tomkins, A. HIV prevalence and mortality among children  
477 undergoing treatment for severe acute malnutrition in sub-Saharan Africa: a  
478 systematic review and meta-analysis. *Trans. R. Soc. Trop. Med. Hyg.* **103**, 541-548,  
479 doi:10.1016/j.trstmh.2008.10.029 (2009).
- 480 10 Ndirangu, M., Wariero, J. O., Sachs, S. E., Masibo, P. & Deckelbaum, R. J.  
481 Nutritional status of under-five children in HIV-affected households in western Kenya.  
482 *Food Nutr. Bull.* **32**, 159-167, doi:10.1177/156482651103200208 (2011).

- 483 11 Rose, A. M., Hall, C. S. & Martinez-Alier, N. Aetiology and management of  
484 malnutrition in HIV-positive children. *Arch. Dis. Child.* **99**, 546-551,  
485 doi:10.1136/archdischild-2012-303348 (2014).
- 486 12 Trehan, I., O'Hare, B. A., Phiri, A. & Heikens, G. T. Challenges in the Management of  
487 HIV-Infected Malnourished Children in Sub-Saharan Africa. *AIDS Res. Treat.* **2012**,  
488 8, doi:10.1155/2012/790786 (2012).
- 489 13 Bandsma, R. H. J. *et al.* A reduced-carbohydrate and lactose-free formulation for  
490 stabilization among hospitalized children with severe acute malnutrition: A double-  
491 blind, randomized controlled trial. *PLoS Med.* **16**, e1002747,  
492 doi:10.1371/journal.pmed.1002747 (2019).
- 493 14 Mody, A. *et al.* Effects of HIV infection on the metabolic and hormonal status of  
494 children with severe acute malnutrition. *PLoS One* **9**, e102233,  
495 doi:10.1371/journal.pone.0102233 (2014).
- 496 15 Tacnet-Delorme, P. *et al.* In Vitro Analysis of Complement-Dependent HIV-1 Cell  
497 Infection Using a Model System. *The Journal of Immunology* **162**, 4088 (1999).
- 498 16 Stoiber, H., Kacani, L., Speth, C., Würzner, R. & Dierich, M. P. The supportive role of  
499 complement in HIV pathogenesis. *Immunol. Rev.* **180**, 168-176, doi:10.1034/j.1600-  
500 065X.2001.1800115.x (2001).
- 501 17 Stoiber, H., Speth, C. & Dierich, M. P. Role of complement in the control of HIV  
502 dynamics and pathogenesis. *Vaccine* **21**, S77-S82, doi:[https://doi.org/10.1016/S0264-  
503 410X\(03\)00203-2](https://doi.org/10.1016/S0264-410X(03)00203-2) (2003).
- 504 18 Oliveira, J. d. *et al.* Effect of BCHE single nucleotide polymorphisms on lipid  
505 metabolism markers in women. *Genet. Mol. Biol.* **40**, 408-414, doi:10.1590/1678-  
506 4685-GMB-2016-0123 (2017).
- 507 19 Xu, L. *et al.* Butyrylcholinesterase Levels on Admission Predict Severity and 12-  
508 Month Mortality in Hospitalized AIDS Patients. *Mediators Inflamm.* **2018**, 5201652,  
509 doi:10.1155/2018/5201652 (2018).
- 510 20 Santarpia, L., Grandone, I., Contaldo, F. & Pasanisi, F. Butyrylcholinesterase as a  
511 prognostic marker: a review of the literature. *Journal of cachexia, sarcopenia and  
512 muscle* **4**, 31-39, doi:10.1007/s13539-012-0083-5 (2013).
- 513 21 Chen, V. P. *et al.* Butyrylcholinesterase Deficiency Promotes Adipose Tissue Growth  
514 and Hepatic Lipid Accumulation in Male Mice on High-Fat Diet. *Endocrinology* **157**,  
515 3086-3095, doi:10.1210/en.2016-1166 (2016).
- 516 22 Sridhar, G. *et al.* Serum butyrylcholinesterase in type 2 diabetes mellitus: a  
517 biochemical and bioinformatics approach. *Lipids Health Dis.* **4**, 18, doi:10.1186/1476-  
518 511x-4-18 (2005).
- 519 23 Ceperuelo-Mallafre, V. *et al.* Zinc alpha-2 glycoprotein is implicated in dyslipidaemia  
520 in HIV-1-infected patients treated with antiretroviral drugs. *HIV Med.* **13**, 297-303,  
521 doi:10.1111/j.1468-1293.2011.00976.x (2012).
- 522 24 Lei, L. *et al.* Circulating zinc- $\alpha$ 2-glycoprotein levels are low in newly diagnosed  
523 patients with metabolic syndrome and correlate with adiponectin. *Nutr. Metab. (Lond.)*  
524 **14**, 53, doi:10.1186/s12986-017-0210-6 (2017).
- 525 25 Yang, M. *et al.* Zinc- $\alpha$ 2-glycoprotein is associated with insulin resistance in humans  
526 and is regulated by hyperglycemia, hyperinsulinemia, or liraglutide administration:  
527 cross-sectional and interventional studies in normal subjects, insulin-resistant subjects,  
528 and subjects with newly diagnosed diabetes. *Diabetes care* **36**, 1074-1082,  
529 doi:10.2337/dc12-0940 (2013).
- 530 26 Bastard, J. P. *et al.* Diabetes and dyslipidaemia are associated with oxidative stress  
531 independently of inflammation in long-term antiretroviral-treated HIV-infected  
532 patients. *Diabetes Metab.*, doi:10.1016/j.diabet.2019.02.008 (2019).

- 533 27 Nix, L. M. & Tien, P. C. Metabolic syndrome, diabetes, and cardiovascular risk in  
534 HIV. *Curr. HIV/AIDS Rep.* **11**, 271-278, doi:10.1007/s11904-014-0219-7 (2014).
- 535 28 Sobieszczyk, M. E. *et al.* Metabolic Syndrome After HIV Acquisition in South  
536 African Women. *J. Acquir. Immune Defic. Syndr.* **73**, 438-445,  
537 doi:10.1097/qai.0000000000001123 (2016).
- 538 29 Policarpo, S., Rodrigues, T., Moreira, A. C. & Valadas, E. Cardiovascular risk in HIV-  
539 infected individuals: A comparison of three risk prediction algorithms. *Rev. Port.*  
540 *Cardiol.* **38**, 463-470, doi:10.1016/j.repc.2019.08.002 (2019).
- 541 30 Lagathu, C. *et al.* Metabolic complications affecting adipose tissue, lipid and glucose  
542 metabolism associated with HIV antiretroviral treatment. *Expert Opin. Drug Saf.* **18**,  
543 829-840, doi:10.1080/14740338.2019.1644317 (2019).
- 544 31 Sears, S. *et al.* Metabolic Syndrome Among People Living with HIV Receiving  
545 Medical Care in Southern United States: Prevalence and Risk Factors. *AIDS Behav.*,  
546 doi:10.1007/s10461-019-02487-8 (2019).
- 547 32 Seth, A. & Sherman, K. E. Fatty liver disease in persons with HIV infection. *Top.*  
548 *Antivir. Med.* **27**, 75-82 (2019).
- 549 33 Palios, J., Kadoglou, N. P. E. & Lampropoulos, S. The pathophysiology of HIV-  
550 /HAART-related metabolic syndrome leading to cardiovascular disorders: the  
551 emerging role of adipokines. *Exp. Diabetes Res.* **2012**, 103063-103063,  
552 doi:10.1155/2012/103063 (2012).
- 553 34 Silva, B., Peixoto, G., da Luz, S., de Moraes, S. & Peres, S. Adverse effects of chronic  
554 treatment with the Main subclasses of highly active antiretroviral therapy: a systematic  
555 review. *HIV Med.* **20**, 429-438, doi:10.1111/hiv.12733 (2019).
- 556 35 Riddler, S. A. *et al.* Impact of HIV Infection and HAART on Serum Lipids in Men.  
557 *JAMA* **289**, 2978-2982, doi:10.1001/jama.289.22.2978 (2003).
- 558 36 Adal, M., Howe, R., Kassa, D., Aseffa, A. & Petros, B. Malnutrition and lipid  
559 abnormalities in antiretroviral naïve HIV-infected adults in Addis Ababa: A cross-  
560 sectional study. *PLOS ONE* **13**, e0195942, doi:10.1371/journal.pone.0195942 (2018).
- 561 37 Rasheed, S., Yan, J. S., Lau, A. & Chan, A. S. HIV Replication Enhances Production  
562 of Free Fatty Acids, Low Density Lipoproteins and Many Key Proteins Involved in  
563 Lipid Metabolism: A Proteomics Study. *PLOS ONE* **3**, e3003,  
564 doi:10.1371/journal.pone.0003003 (2008).
- 565 38 Renga, B. *et al.* HIV-1 infection is associated with changes in nuclear receptor  
566 transcriptome, pro-inflammatory and lipid profile of monocytes. *BMC Infect. Dis.* **12**,  
567 274, doi:10.1186/1471-2334-12-274 (2012).
- 568 39 Trehan, I. & Manary, M. J. Management of severe acute malnutrition in low-income  
569 and middle-income countries. *Arch. Dis. Child.* **100**, 283-287,  
570 doi:10.1136/archdischild-2014-306026 (2015).
- 571 40 Joy, T. *et al.* Dietary fat intake and relationship to serum lipid levels in HIV-infected  
572 patients with metabolic abnormalities in the HAART era. *AIDS (London, England)* **21**,  
573 1591-1600, doi:10.1097/QAD.0b013e32823644ff (2007).
- 574 41 Mansfield, K. G. *et al.* A diet high in saturated fat and cholesterol accelerates simian  
575 immunodeficiency virus disease progression. *J. Infect. Dis.* **196**, 1202-1210,  
576 doi:10.1086/521680 (2007).
- 577 42 Lindegaard, B. *et al.* Adipose tissue expression of IL-18 and HIV-associated  
578 lipodystrophy. *AIDS* **18**, 1956-1958, doi:10.1097/00002030-200409240-00013 (2004).
- 579 43 Ockenga, J. *et al.* ESPEN Guidelines on Enteral Nutrition: Wasting in HIV and other  
580 chronic infectious diseases. *Clin. Nutr.* **25**, 319-329, doi:10.1016/j.clnu.2006.01.016  
581 (2006).

- 582 44 Wanke, C. A. *et al.* A medium chain triglyceride-based diet in patients with HIV and  
583 chronic diarrhea reduces diarrhea and malabsorption: A prospective, controlled trial.  
584 *Nutrition* **12**, 766-771, doi:[https://doi.org/10.1016/S0899-9007\(96\)00221-3](https://doi.org/10.1016/S0899-9007(96)00221-3) (1996).
- 585 45 Amadi, B. *et al.* Intestinal and systemic infection, HIV, and mortality in Zambian  
586 children with persistent diarrhea and malnutrition. *J. Pediatr. Gastroenterol. Nutr.* **32**,  
587 550-554, doi:10.1097/00005176-200105000-00011 (2001).
- 588 46 Kessler, L., Daley, H., Malenga, G. & Graham, S. The impact of HIV infection on the  
589 clinical presentation of severe malnutrition in children at QECH. *Malawi medical*  
590 *journal : the journal of Medical Association of Malawi* **13**, 30-33 (2001).
- 591 47 Musoke, P. M. & Fergusson, P. Severe malnutrition and metabolic complications of  
592 HIV-infected children in the antiretroviral era: clinical care and management in  
593 resource-limited settings. *The American journal of clinical nutrition* **94**, 1716S-1720S,  
594 doi:10.3945/ajcn.111.018374 (2011).
- 595 48 WHO. *Management of severe malnutrition: a manual for physicians and other senior*  
596 *health workers*, <<http://apps.who.int/iris/bitstream/10665/41999/1/a57361.pdf>>  
597 (1999).
- 598 49 Njunge, J. M. *et al.* Biomarkers of post-discharge mortality among children with  
599 complicated severe acute malnutrition. *Sci. Rep.* **9**, 5981, doi:10.1038/s41598-019-  
600 42436-y (2019).
- 601 50 R Core Team. *R: A language and environment for statistical computing*. R Foundation  
602 *for Statistical Computing*, <<https://www.R-project.org/>> (2017).
- 603 51 Kim, R. S. & Kaplan, R. C. Analysis of secondary outcomes in nested case-control  
604 study designs. *Stat. Med.* **33**, 4215-4226, doi:10.1002/sim.6231 (2014).
- 605 52 Samuelsen, S. O. A Pseudolikelihood Approach to Analysis of Nested Case-Control  
606 Studies. *Biometrika* **84**, 379-394 (1997).
- 607 53 Pan, Y., Cai, J., Longnecker, M. P. & Zhou, H. Secondary outcome analysis for data  
608 from an outcome-dependent sampling design. *Stat. Med.* **37**, 2321-2337,  
609 doi:10.1002/sim.7672 (2018).
- 610 54 Jiang, Y., Scott, A. J. & Wild, C. J. Secondary analysis of case-control data. *Stat. Med.*  
611 **25**, 1323-1339, doi:10.1002/sim.2283 (2006).
- 612 55 Benjamini, Y. & Hochberg, Y. Controlling the False Discovery Rate: A Practical and  
613 Powerful Approach to Multiple Testing. *Journal of the Royal Statistical Society.*  
614 *Series B (Methodological)* **57**, 289-300 (1995).
- 615 56 Friedman, J. H., Hastie, T. & Tibshirani, R. Regularization Paths for Generalized  
616 Linear Models via Coordinate Descent. *2010* **33**, 22, doi:10.18637/jss.v033.i01  
617 (2010).
- 618 57 Zou, H. & Hastie, T. Regularization and variable selection via the elastic net. *J. Roy.*  
619 *Stat. Soc. Ser. B. (Stat. Method.)* **67**, 301-320, doi:10.1111/j.1467-9868.2005.00503.x  
620 (2005).
- 621 58 Huang, D. W., Sherman, B. T. & Lempicki, R. A. Systematic and integrative analysis  
622 of large gene lists using DAVID bioinformatics resources. *Nat. Protocols* **4**, 44-57,  
623 doi:[http://www.nature.com/nprot/journal/v4/n1/supinfo/nprot.2008.211\\_S1.html](http://www.nature.com/nprot/journal/v4/n1/supinfo/nprot.2008.211_S1.html)  
624 (2008).
- 625 59 Smith, G. C. S., Seaman, S. R., Wood, A. M., Royston, P. & White, I. R. Correcting  
626 for Optimistic Prediction in Small Data Sets. *Am. J. Epidemiol.* **180**, 318-324,  
627 doi:10.1093/aje/kwu140 (2014).
- 628 60 Huang da, W., Sherman, B. T. & Lempicki, R. A. Systematic and integrative analysis  
629 of large gene lists using DAVID bioinformatics resources. *Nat. Protoc.* **4**, 44-57,  
630 doi:10.1038/nprot.2008.211 (2009).

631 61 Walter, W., Sanchez-Cabo, F. & Ricote, M. GOpot: an R package for visually  
632 combining expression data with functional analysis. *Bioinformatics* **31**, 2912-2914,  
633 doi:10.1093/bioinformatics/btv300 (2015).  
634

635 Figure Legend

636

637 **Figure 1. Univariate analysis of plasma proteome and individual plasma cytokines**  
638 **associated with HIV.** (A) Volcano plot showing several significantly different (FDR adjusted  
639  $p$  value  $< 0.05$ ) proteins and their log<sub>2</sub> HIV(+) versus HIV(-) fold change. Red points  
640 represent those significantly higher in plasma of HIV(-), blue points significantly enriched in  
641 plasma of HIV(+) and orange points significantly higher than 1.5 folds in HIV(+) compared  
642 to HIV(-) SAM children. Vertical lines indicate significance level at  $p = 0.05$  and  $0.01$ ;  
643 horizontal lines indicate more than 1.5 folds enrichment. (B) Log odds plots showing  
644 association of chemokine markers analysed using Luminex platform and HIV status. Points  
645 indicate log odds ratio for every log increase in plasma protein concentration; bars indicate  
646 95% confidence interval.  
647

648 **Figure 2. Multivariate analysis of plasma proteome associated with HIV.** (A) Elastic net  
649 (EN) regularized regression lambda parameter optimization curve, optimal lambda parameter  
650 was chosen based on the highest area under the receiver operator curve (AUROC); (B)  
651 AUROC (0.97 [95% CI: 0.95 – 0.99]) of the EN model generated using the lambda parameter,  
652 alpha parameter was set to 0.75, final model extracted 34 protein features, optimism-adjusted  
653 bootstrap validation of the generated EN model, validated AUROC = 0.90 [95% CI: 0.90 –  
654 0.90] using 2000 iterations; (C) Gene ontology (GO-terms) enrichment analysis of proteins  
655 extracted by the EN model. X-axis represents z-scores; y-axis, fold enrichment, and size of  
656 the spheres represent the number of proteins involved in the particular pathway. Gold circles  
657 represent pathways enriched in HIV(+) whereas blue circles are pathways more associated  
658 with HIV(-). The grey circle indicate that there are as much proteins in this pathway that are  
659 significantly upregulated and downregulated in HIV. Only significantly enriched pathways ( $p$   
660  $< 0.05$  after FDR adjustment) are plotted. See main text for explanation of the plots. Pathways  
661 enriched are identified in the table. (D) Log odds ratio plot of the 3 proteins extracted after  
662 bootstrap validation with log odds on the x-axis and bars indicating 95% confidence interval  
663 obtained using weighted logistic regression with HIV as outcome variable and the 3 proteins  
664 as covariates. Weights used were obtained by inverse probability of treatment weights; (E)  
665 Predictive ability of the weighted logistic regression model using the 3 bootstrap validated  
666 proteins with HIV as outcome variable, AUROC = 0.80 [95% CI: 0.73 – 0.87]  
667

668



669 Tables

670 Table 1. Descriptive characteristics of the study participants

|                                          | All                   | HIV (+)               | HIV (-)               | Unknown HIV status    | <i>p</i> *                    |
|------------------------------------------|-----------------------|-----------------------|-----------------------|-----------------------|-------------------------------|
| n (%)                                    | 843                   | 179 (21%)             | 618 (73%)             | 46 (5%)               |                               |
| Median age in months [IQR]               | 16 [10 – 25]          | 21 [12 – 31]          | 16 [10 – 25]          | 10 [8 – 17]           | <b>&lt;0.001</b>              |
| % girls (n)                              | 45% (359)             | 45% (81)              | 45% (278)             | 56% (26)              | 0.95                          |
| Mean MUAC in cm [95% CI]                 | 11.2 [11.1 - 11.3]    | 10.5 [10.36 - 10.7]   | 11.4 [11.3 -11.5]     | 11.2 [10.9 – 11.5]    | <b>&lt;0.001</b>              |
| Mean weight-for-age z-score [95% CI]     | -4.01 [-4.11 – -3.92] | -4.51 [-4.72 – -4.31] | -3.92 [-4.03 – -3.80] | -3.56 [-3.94 – -3.92] | <b>&lt;0.001</b>              |
| % mortality (n)                          | 15% (127)             | 26% (47)              | 10% (64)              | 34% (16)              | <b>&lt;0.001</b> <sup>o</sup> |
| % oedematous (n)                         | 31% (264)             | 30% (54)              | 33% (203)             | 15% (7)               | 0.50                          |
| Site                                     |                       |                       |                       |                       |                               |
| Coast Provincial General Hospital, Kenya | 39% (329)             | 25% (45)              | 40% (247)             | 80% (37)              | <i>Reference</i>              |
| Kilifi County Hospital, Kenya            | 22% (187)             | 22% (40)              | 23% (145)             | 4% (2)                | 0.08                          |
| Queen Elizabeth Central Hospital, Malawi | 39% (327)             | 52% (94)              | 36% (226)             | 15% (7)               | <b>&lt;0.001</b>              |

671 \*comparison between HIV(+) and HIV(-); <sup>o</sup>adjusted for age, sex and site of recruitment

672

673

674 Table 2. Patient characteristics of those subjected to proteomics analysis

|                                              | All                | HIV (+)           | HIV (-)            | <i>p</i> *                    |
|----------------------------------------------|--------------------|-------------------|--------------------|-------------------------------|
| n                                            | 167                | 54                | 113                |                               |
| Median age in months [IQR]                   | 15 [10 – 26]       | 15 [10 – 26]      | 15 [10 – 24]       | 0.433                         |
| n girls (%)                                  | 76 (45%)           | 27 (50%)          | 49 (43%)           | 0.506                         |
| Mean MUAC at admission (cm) [95% CI]         | 10.9 [10.7 - 11.1] | 10.2 [9.8 - 10.5] | 11.3 [11.0 - 11.5] | <b>&lt;0.001</b>              |
| n oedematous (%)                             | 49 (29%)           | 15 (28%)          | 34 (30%)           | 0.856                         |
| n mortality (%)                              | 79 (47%)           | 36 (67%)          | 43 (38%)           | <b>&lt;0.001</b> <sup>o</sup> |
| <i>Use of antiretroviral medication</i>      |                    |                   |                    |                               |
| Naïve                                        |                    | 27 (50%)          |                    |                               |
| highly active antiretroviral therapy (HAART) |                    | 14 (26%)          |                    |                               |
| Nevirapine only                              |                    | 3 (6%)            |                    |                               |
| Unknown                                      |                    | 10 (18%)          |                    |                               |

675 \*comparison between HIV(+) and HIV(-), <sup>o</sup>adjusted for age, sex, site of recruitment, oedema

676

677

678 Table 3. Nutritional management protocol for children with severe acute malnutrition <sup>39</sup>

|                                                    | <b>Stabilization phase</b> | <b>In-patient Rehabilitation phase</b> | <b>Out-patient Rehabilitation phase</b> |
|----------------------------------------------------|----------------------------|----------------------------------------|-----------------------------------------|
|                                                    | <i>Days 1 - 7</i>          | <i>Weeks 2 - 6</i>                     | <i>Lengths vary depending on site</i>   |
| <b>Complicated SAM</b>                             | <b>F75</b>                 | <b>F100</b>                            | <b>RUTF</b>                             |
| <b>Uncomplicated SAM</b>                           | -                          | -                                      | <b>RUTF</b>                             |
| <i>Composition</i>                                 |                            |                                        |                                         |
| Energy (kcal per 100 mL<br>F75/F100 or 100 g RUTF) | 75                         | 100                                    | 5.2 – 5.5                               |
| Protein (% total energy)                           | 5                          | 12                                     | 10 – 12                                 |
| Fat (% total energy)                               | 32                         | 53                                     | 45 - 60                                 |

679

680  
681

Supplementary Table 1. Prior use of anti-retroviral treatment among all HIV (+) children included in the clinical trial

|                                      | Prior HIV treatment*                      |                  |                    |                                           |
|--------------------------------------|-------------------------------------------|------------------|--------------------|-------------------------------------------|
|                                      | HAART                                     | NVP only         | ART naïve          | Unknown                                   |
| n (%) <sup>o</sup>                   | 53 (30%)                                  | 7 (4%)           | 90 (50%)           | 29 (16%)                                  |
| Mean MUAC at admission (cm) [95% CI] | 10.9 [10.5 - 11.4]                        | 9.8 [8.9 - 10.6] | 10.5 [10.2 - 10.8] | 9.6 [8.1 - 11.1]                          |
| Mortality n (%)                      | 10 (18%)                                  | 1 (28%)          | 25 (28%)           | 1 (25%)                                   |
| Odds ratio for mortality [95% CI]    | 0.97 [0.82 - 1.12]<br>p=0.63 <sup>#</sup> | -                | Reference          | 1.07 [0.88 - 1.30]<br>p=0.45 <sup>#</sup> |

682 \*HAART - highly active antiretroviral therapy; NVP – Nevirapine; <sup>#</sup> adjusted for age, sex, site and oedema  
683

684 Supplementary table 2. Association between individual proteins to HIV status  
685

| Uniprot accession | Protein code | Protein names                                                                                                                                                                                                                                                | log FC* | p°   |
|-------------------|--------------|--------------------------------------------------------------------------------------------------------------------------------------------------------------------------------------------------------------------------------------------------------------|---------|------|
| P05109            | S100A8       | Protein S100-A8 (Calgranulin-A) (Calprotectin L1L subunit) (Cystic fibrosis antigen) (CFAG) (Leukocyte L1 complex light chain) (Migration inhibitory factor-related protein 8) (MRP-8) (p8) (S100 calcium-binding protein A8) (Urinary stone protein band A) | 0.56    | 0.00 |
| P06702            | S100A9       | Protein S100-A9 (Calgranulin-B) (Calprotectin L1H subunit) (Leukocyte L1 complex heavy chain) (Migration inhibitory factor-related protein 14) (MRP-14) (p14) (S100 calcium-binding protein A9)                                                              | 0.55    | 0.00 |
| P01708            |              | Immunoglobulin lambda variable 2-11 (Ig gamma lambda chain V-II region DOT) (Ig lambda chain V-II region BOH) (Ig lambda chain V-II region BUR) (Ig lambda chain V-II region NIG-58) (Ig lambda chain V-II region TRO) (Ig lambda chain V-II region WIN)     | 0.59    | 0.01 |
| P04275            | VWF          | von Willebrand factor (vWF) [Cleaved into: von Willebrand antigen 2 (von Willebrand antigen II)]                                                                                                                                                             | 0.33    | 0.01 |
| P01880            | IGHD         | Immunoglobulin heavy constant delta (Ig delta chain C region) (Ig delta chain C region NIG-65) (Ig delta chain C region WAH)                                                                                                                                 | 0.60    | 0.01 |
| P23083            | IGHV1-2      | Immunoglobulin heavy variable 1-2 (Ig heavy chain V-I region ND) (Ig heavy chain V-I region V35)                                                                                                                                                             | 0.60    | 0.01 |
| P01598            |              | Immunoglobulin kappa variable 1-5 (Ig kappa chain V-I region CAR) (Ig kappa chain V-I region EU) (Ig kappa chain V-I region HK102) (Ig kappa chain V-I region Kue)                                                                                           | 0.55    | 0.01 |
| P80748            | IGLV3-21     | Immunoglobulin lambda variable 3-21 (Ig lambda chain V-III region LOI) (Ig lambda chain V-V region DEL) (Ig lambda chain V-VII region MOT)                                                                                                                   | 0.58    | 0.01 |
| P13796            | LCP1         | Plastin-2 (L-plastin) (LC64P) (Lymphocyte cytosolic protein 1) (LCP-1)                                                                                                                                                                                       | 0.28    | 0.01 |
| P01857            | IGHG1        | Immunoglobulin heavy constant gamma 1 (Ig gamma-1 chain C region) (Ig gamma-1 chain C region EU) (Ig gamma-1 chain C region KOL) (Ig gamma-1 chain C region NIE)                                                                                             | 0.64    | 0.01 |
| P05362            | ICAM1        | Intercellular adhesion molecule 1 (ICAM-1) (Major group rhinovirus receptor) (CD antigen CD54)                                                                                                                                                               | 0.28    | 0.01 |
| P06318            |              | Immunoglobulin lambda variable 6-57 (Ig lambda chain V-VI region AR) (Ig lambda                                                                                                                                                                              | 0.49    | 0.01 |

|        |          |                                                                                                                                                                                                                                         |      |      |
|--------|----------|-----------------------------------------------------------------------------------------------------------------------------------------------------------------------------------------------------------------------------------------|------|------|
|        |          | chain V-VI region EB4) (Ig lambda chain V-VI region NIG-48) (Ig lambda chain V-VI region SUT) (Ig lambda chain V-VI region WLT)                                                                                                         |      |      |
| P18428 | LBP      | Lipopolysaccharide-binding protein (LBP)                                                                                                                                                                                                | 0.31 | 0.01 |
| P01834 | IGKC     | Immunoglobulin kappa constant (Ig kappa chain C region) (Ig kappa chain C region AG) (Ig kappa chain C region CUM) (Ig kappa chain C region EU) (Ig kappa chain C region OU) (Ig kappa chain C region ROY) (Ig kappa chain C region TI) | 0.69 | 0.02 |
| P0CG05 |          | Immunoglobulin lambda constant 3 (Ig lambda chain C region DOT) (Ig lambda chain C region NEWM) (Ig lambda-3 chain C regions)                                                                                                           | 0.67 | 0.02 |
| P0CG05 |          | Immunoglobulin lambda constant 2 (Ig lambda chain C region Kern) (Ig lambda chain C region NIG-64) (Ig lambda chain C region SH) (Ig lambda chain C region X) (Ig lambda-2 chain C region)                                              | 0.67 | 0.02 |
| B9A064 | IGLL5    | Immunoglobulin lambda-like polypeptide 5 (G lambda-1) (Germline immunoglobulin lambda 1)                                                                                                                                                | 0.60 | 0.02 |
| H9KV70 |          | Deleted.                                                                                                                                                                                                                                | 0.27 | 0.02 |
| P01597 | IGKV1-39 | Immunoglobulin kappa variable 1-39 (Ig kappa chain V-I region DEE) (Ig kappa chain V-I region Hau) (Ig kappa chain V-I region Mev) (Ig kappa chain V-I region OU) (Ig kappa chain V-I region Walker)                                    | 0.47 | 0.02 |
| P01714 | IGLV3-19 | Immunoglobulin lambda variable 3-19 (Ig lambda chain V-III region SH)                                                                                                                                                                   | 0.54 | 0.02 |
| P06331 | IGHV4-34 | Immunoglobulin heavy variable 4-34 (Ig heavy chain V-II region ARH-77)                                                                                                                                                                  | 0.49 | 0.02 |
| P19652 | ORM2     | Alpha-1-acid glycoprotein 2 (AGP 2) (Orosomucoid-2) (OMD 2)                                                                                                                                                                             | 0.20 | 0.02 |
| P01610 |          | Immunoglobulin kappa variable 1-17 (Ig kappa chain V-I region Gal) (Ig kappa chain V-I region WEA)                                                                                                                                      | 0.52 | 0.02 |
| P01781 |          | Immunoglobulin heavy variable 3-7 (Ig heavy chain V-III region GAL) (Ig heavy chain V-III region GAR) (Ig heavy chain V-III region JON)                                                                                                 | 0.55 | 0.02 |
| P02741 | CRP      | C-reactive protein [Cleaved into: C-reactive protein(1-205)]                                                                                                                                                                            | 0.51 | 0.02 |
| P01717 | IGLV3-25 | Immunoglobulin lambda variable 3-25 (Ig lambda chain V-IV region Hil)                                                                                                                                                                   | 0.46 | 0.02 |
| P01719 |          | Immunoglobulin lambda variable 3-21 (Ig lambda chain V-III region LOI) (Ig lambda chain V-V region DEL) (Ig lambda chain V-VII region MOT)                                                                                              | 0.44 | 0.02 |

|          |          |                                                                                                                                                                                                                                                                                                                                                           |       |      |
|----------|----------|-----------------------------------------------------------------------------------------------------------------------------------------------------------------------------------------------------------------------------------------------------------------------------------------------------------------------------------------------------------|-------|------|
| P06681   | C2       | Complement C2 (EC 3.4.21.43) (C3/C5 convertase) [Cleaved into: Complement C2b fragment; Complement C2a fragment]                                                                                                                                                                                                                                          | 0.15  | 0.02 |
| Q15848   | ADIPOQ   | Adiponectin (30 kDa adipocyte complement-related protein) (Adipocyte complement-related 30 kDa protein) (ACRP30) (Adipocyte, C1q and collagen domain-containing protein) (Adipose most abundant gene transcript 1 protein) (apM-1) (Gelatin-binding protein)                                                                                              | -0.23 | 0.02 |
| P04208   |          | Immunoglobulin lambda variable 1-47 (Ig lambda chain V-I region HA) (Ig lambda chain V-I region WAH)                                                                                                                                                                                                                                                      | 0.53  | 0.02 |
| Q15485   | FCN2     | Ficolin-2 (37 kDa elastin-binding protein) (Collagen/fibrinogen domain-containing protein 2) (EBP-37) (Ficolin-B) (Ficolin-beta) (Hucolin) (L-ficolin) (Serum lectin p35)                                                                                                                                                                                 | 0.26  | 0.03 |
| P18135   |          | Immunoglobulin kappa variable 3-20 (Ig kappa chain V-III region B6) (Ig kappa chain V-III region GOL) (Ig kappa chain V-III region HAH) (Ig kappa chain V-III region HIC) (Ig kappa chain V-III region IARC/BL41) (Ig kappa chain V-III region NG9) (Ig kappa chain V-III region SIE) (Ig kappa chain V-III region Ti) (Ig kappa chain V-III region WOL)  | 0.57  | 0.03 |
| P01613   |          | Immunoglobulin kappa variable 1D-33 (Ig kappa chain V-I region AG) (Ig kappa chain V-I region Bi) (Ig kappa chain V-I region Lay) (Ig kappa chain V-I region Ni) (Ig kappa chain V-I region Rei) (Ig kappa chain V-I region Roy) (Ig kappa chain V-I region Scw) (Ig kappa chain V-I region WAT)                                                          | 0.45  | 0.04 |
| P01602   | IGKV1-5  | Immunoglobulin kappa variable 1-5 (Ig kappa chain V-I region CAR) (Ig kappa chain V-I region EU) (Ig kappa chain V-I region HK102) (Ig kappa chain V-I region Kue)                                                                                                                                                                                        | 0.55  | 0.04 |
| P04211   | IGLV7-43 | Immunoglobulin lambda variable 7-43 (Ig lambda chain V region 4A)                                                                                                                                                                                                                                                                                         | 0.49  | 0.04 |
| P01042_2 | KNG1     | Kininogen-1 (Alpha-2-thiol proteinase inhibitor) (Fitzgerald factor) (High molecular weight kininogen) (HMWK) (Williams-Fitzgerald-Flaujeac factor) [Cleaved into: Kininogen-1 heavy chain; T-kinin (Ile-Ser-Bradykinin); Bradykinin (Kallidin I); Lysyl-bradykinin (Kallidin II); Kininogen-1 light chain; Low molecular weight growth-promoting factor] | -0.28 | 0.04 |
| H0YGL9   |          | Deleted.                                                                                                                                                                                                                                                                                                                                                  | 0.82  | 0.04 |
| A0M8Q6   | IGLC7    | Immunoglobulin lambda constant 7 (Ig                                                                                                                                                                                                                                                                                                                      | 0.54  | 0.05 |

|          |          |                                                                                                                                                                                                                                                                                                                                                          |       |      |
|----------|----------|----------------------------------------------------------------------------------------------------------------------------------------------------------------------------------------------------------------------------------------------------------------------------------------------------------------------------------------------------------|-------|------|
|          |          | lambda-7 chain C region)                                                                                                                                                                                                                                                                                                                                 |       |      |
| P01617   |          | Immunoglobulin kappa variable 2D-28 (Ig kappa chain V-II region FR) (Ig kappa chain V-II region GM607) (Ig kappa chain V-II region MIL) (Ig kappa chain V-II region TEW)                                                                                                                                                                                 | 0.37  | 0.05 |
| P01620   |          | Immunoglobulin kappa variable 3-20 (Ig kappa chain V-III region B6) (Ig kappa chain V-III region GOL) (Ig kappa chain V-III region HAH) (Ig kappa chain V-III region HIC) (Ig kappa chain V-III region IARC/BL41) (Ig kappa chain V-III region NG9) (Ig kappa chain V-III region SIE) (Ig kappa chain V-III region Ti) (Ig kappa chain V-III region WOL) | 0.44  | 0.05 |
| P01702   |          | Immunoglobulin lambda variable 1-51 (Ig lambda chain V-I region BL2) (Ig lambda chain V-I region EPS) (Ig lambda chain V-I region NEW) (Ig lambda chain V-I region NIG-64)                                                                                                                                                                               | 0.65  | 0.05 |
| Q6UXB8_2 | PI-16    | Peptidase inhibitor 16 (PI-16) (Cysteine-rich secretory protein 9) (CRISP-9) (PSP94-binding protein) (CD antigen CD364)                                                                                                                                                                                                                                  | -0.22 | 0.05 |
| P01876   | IGHA1    | Immunoglobulin heavy constant alpha 1 (Ig alpha-1 chain C region) (Ig alpha-1 chain C region BUR) (Ig alpha-1 chain C region TRO)                                                                                                                                                                                                                        | 0.51  | 0.05 |
| P04196   | HRG      | Histidine-rich glycoprotein (Histidine-proline-rich glycoprotein) (HPRG)                                                                                                                                                                                                                                                                                 | -0.26 | 0.05 |
| P04433   | IGKV3-11 | Immunoglobulin kappa variable 3-11 (Ig kappa chain V-III region VG)                                                                                                                                                                                                                                                                                      | 0.57  | 0.05 |
| P06310   | IGKV2-30 | Immunoglobulin kappa variable 2-30 (Ig kappa chain V-II region RPMI 6410)                                                                                                                                                                                                                                                                                | 0.52  | 0.05 |
| G8JLA8   |          | Deleted.                                                                                                                                                                                                                                                                                                                                                 | 0.11  | 0.07 |
| P01034   | CST3     | Cystatin-C (Cystatin-3) (Gamma-trace) (Neuroendocrine basic polypeptide) (Post-gamma-globulin)                                                                                                                                                                                                                                                           | 0.16  | 0.07 |
| P01765   |          | Immunoglobulin heavy variable 3-23 (Ig heavy chain V-III region LAY) (Ig heavy chain V-III region POM) (Ig heavy chain V-III region TEI) (Ig heavy chain V-III region TIL) (Ig heavy chain V-III region TUR) (Ig heavy chain V-III region VH26) (Ig heavy chain V-III region WAS) (Ig heavy chain V-III region ZAP)                                      | 0.49  | 0.07 |
| P04003   | C4BPA    | C4b-binding protein alpha chain (C4bp) (Proline-rich protein) (PRP)                                                                                                                                                                                                                                                                                      | 0.10  | 0.07 |
| P01743   | IGHV1-46 | Immunoglobulin heavy variable 1-46 (Ig heavy chain V-I region DOT) (Ig heavy chain V-I region HG3) (Ig heavy chain V-I region Mot)                                                                                                                                                                                                                       | 0.45  | 0.07 |



|          |          |                                                                                                                                                                                                                                                                                                                                                          |       |      |
|----------|----------|----------------------------------------------------------------------------------------------------------------------------------------------------------------------------------------------------------------------------------------------------------------------------------------------------------------------------------------------------------|-------|------|
| P01031   | C5       | Complement C5 (C3 and PZP-like alpha-2-macroglobulin domain-containing protein 4) [Cleaved into: Complement C5 beta chain; Complement C5 alpha chain; C5a anaphylatoxin; Complement C5 alpha' chain]                                                                                                                                                     | 0.07  | 0.07 |
| P01764   | IGHV3-23 | Immunoglobulin heavy variable 3-23 (Ig heavy chain V-III region LAY) (Ig heavy chain V-III region POM) (Ig heavy chain V-III region TEI) (Ig heavy chain V-III region TIL) (Ig heavy chain V-III region TUR) (Ig heavy chain V-III region VH26) (Ig heavy chain V-III region WAS) (Ig heavy chain V-III region ZAP)                                      | 0.49  | 0.07 |
| P01766   | IGHV3-13 | Immunoglobulin heavy variable 3-13 (Ig heavy chain V-III region BRO)                                                                                                                                                                                                                                                                                     | 0.41  | 0.07 |
| P01767   | IGHV3-53 | Immunoglobulin heavy variable 3-53 (Ig heavy chain V-III region BUT)                                                                                                                                                                                                                                                                                     | 0.31  | 0.07 |
| P02748   | C9       | Complement component C9 [Cleaved into: Complement component C9a; Complement component C9b]                                                                                                                                                                                                                                                               | 0.12  | 0.07 |
| Q06033_2 |          | Inter-alpha-trypsin inhibitor heavy chain H3 (ITI heavy chain H3) (ITI-HC3) (Inter-alpha-inhibitor heavy chain 3) (Serum-derived hyaluronan-associated protein) (SHAP)                                                                                                                                                                                   | 0.13  | 0.07 |
| F5H6I0   | B2M      | Beta-2-microglobulin                                                                                                                                                                                                                                                                                                                                     | 0.14  | 0.07 |
| P01871   | IGHM     | Immunoglobulin heavy constant mu (Ig mu chain C region) (Ig mu chain C region BOT) (Ig mu chain C region GAL) (Ig mu chain C region OU)                                                                                                                                                                                                                  | 0.44  | 0.07 |
| P08571   | CD14     | Monocyte differentiation antigen CD14 (Myeloid cell-specific leucine-rich glycoprotein) (CD antigen CD14) [Cleaved into: Monocyte differentiation antigen CD14, urinary form; Monocyte differentiation antigen CD14, membrane-bound form]                                                                                                                | 0.13  | 0.08 |
| O00391_2 |          | Sulfhydryl oxidase 1 (hQSOX) (EC 1.8.3.2) (Quiescin Q6)                                                                                                                                                                                                                                                                                                  | 0.11  | 0.08 |
| P04206   |          | Immunoglobulin kappa variable 3-20 (Ig kappa chain V-III region B6) (Ig kappa chain V-III region GOL) (Ig kappa chain V-III region HAH) (Ig kappa chain V-III region HIC) (Ig kappa chain V-III region IARC/BL41) (Ig kappa chain V-III region NG9) (Ig kappa chain V-III region SIE) (Ig kappa chain V-III region Ti) (Ig kappa chain V-III region WOL) | 0.34  | 0.08 |
| P07225   | PROS1    | Vitamin K-dependent protein S                                                                                                                                                                                                                                                                                                                            | 0.04  | 0.08 |
| P29622   | SERPI4   | Kallistatin (Kallikrein inhibitor) (Peptidase inhibitor 4) (PI-4) (Serpine A4)                                                                                                                                                                                                                                                                           | -0.16 | 0.08 |
| H0Y755   | FCGR3A   | Low affinity immunoglobulin gamma Fc                                                                                                                                                                                                                                                                                                                     | 0.18  | 0.08 |

|        |           |                                                                                                                                                                                                                                                                                                                                                                                         |       |      |
|--------|-----------|-----------------------------------------------------------------------------------------------------------------------------------------------------------------------------------------------------------------------------------------------------------------------------------------------------------------------------------------------------------------------------------------|-------|------|
|        |           | region receptor III-A (Fragment)                                                                                                                                                                                                                                                                                                                                                        |       |      |
| P10643 | C7        | Complement component C7                                                                                                                                                                                                                                                                                                                                                                 | 0.06  | 0.08 |
| P01859 | IGHG2     | Immunoglobulin heavy constant gamma 2 (Ig gamma-2 chain C region) (Ig gamma-2 chain C region DOT) (Ig gamma-2 chain C region TIL) (Ig gamma-2 chain C region ZIE)                                                                                                                                                                                                                       | 0.36  | 0.09 |
| P01625 |           | Immunoglobulin kappa variable 4-1 (Ig kappa chain V-IV region B17) (Ig kappa chain V-IV region JI) (Ig kappa chain V-IV region Len) (Ig kappa chain V-IV region STH)                                                                                                                                                                                                                    | 0.38  | 0.09 |
| O75636 | FCN3      | Ficolin-3 (Collagen/fibrinogen domain-containing lectin 3 p35) (Collagen/fibrinogen domain-containing protein 3) (Hakata antigen)                                                                                                                                                                                                                                                       | 0.14  | 0.09 |
| P25311 | AZGP1     | Zinc-alpha-2-glycoprotein (Zn-alpha-2-GP) (Zn-alpha-2-glycoprotein)                                                                                                                                                                                                                                                                                                                     | -0.14 | 0.09 |
| Q96PD5 | PGLYRP2   | N-acetylmuramoyl-L-alanine amidase (EC 3.5.1.28) (Peptidoglycan recognition protein 2) (Peptidoglycan recognition protein long) (PGRP-L)                                                                                                                                                                                                                                                | -0.14 | 0.10 |
| P01019 | AGT       | Angiotensinogen (Serp1n A8) [Cleaved into: Angiotensin-1 (Angiotensin 1-10) (Angiotensin I) (Ang I); Angiotensin-2 (Angiotensin 1-8) (Angiotensin II) (Ang II); Angiotensin-3 (Angiotensin 2-8) (Angiotensin III) (Ang III) (Des-Asp[1]-angiotensin II); Angiotensin-4 (Angiotensin 3-8) (Angiotensin IV) (Ang IV); Angiotensin 1-9; Angiotensin 1-7; Angiotensin 1-5; Angiotensin 1-4] | 0.21  | 0.11 |
| P04040 | CAT       | Catalase (EC 1.11.1.6)                                                                                                                                                                                                                                                                                                                                                                  | 0.18  | 0.11 |
| P01860 | IGHG3     | Immunoglobulin heavy constant gamma 3 (HDC) (Heavy chain disease protein) (Ig gamma-3 chain C region)                                                                                                                                                                                                                                                                                   | 0.35  | 0.11 |
| P01611 | IGKV1D-12 | Immunoglobulin kappa variable 1D-12 (Ig kappa chain V-I region Wes)                                                                                                                                                                                                                                                                                                                     | 0.30  | 0.11 |
| P07195 | LDHB      | L-lactate dehydrogenase B chain (LDH-B) (EC 1.1.1.27) (LDH heart subunit) (LDH-H) (Renal carcinoma antigen NY-REN-46)                                                                                                                                                                                                                                                                   | 0.14  | 0.11 |
| Q9NZP8 | C1RL      | Complement C1r subcomponent-like protein (C1r-LP) (C1r-like protein) (EC 3.4.21.-) (C1r-like serine protease analog protein) (CLSPa)                                                                                                                                                                                                                                                    | 0.10  | 0.11 |
| P19823 | ITIH2     | Inter-alpha-trypsin inhibitor heavy chain H2 (ITI heavy chain H2) (ITI-HC2) (Inter-alpha-inhibitor heavy chain 2) (Inter-alpha-trypsin inhibitor complex component II) (Serum-derived hyaluronan-associated protein) (SHAP)                                                                                                                                                             | -0.16 | 0.12 |
| P01624 | IGKV3-15  | Immunoglobulin kappa variable 3-15 (Ig kappa chain V-III region CLL) (Ig kappa                                                                                                                                                                                                                                                                                                          | 0.34  | 0.13 |

|          |             |                                                                                                                                                                                |       |      |
|----------|-------------|--------------------------------------------------------------------------------------------------------------------------------------------------------------------------------|-------|------|
|          |             | chain V-III region POM)                                                                                                                                                        |       |      |
| P02750   | LRG1        | Leucine-rich alpha-2-glycoprotein (LRG)                                                                                                                                        | 0.13  | 0.13 |
| P20851_2 |             | C4b-binding protein beta chain                                                                                                                                                 | 0.03  | 0.13 |
| P07360   | C8G         | Complement component C8 gamma chain                                                                                                                                            | 0.05  | 0.13 |
| F5GY80   | C8B         | Complement component C8 beta chain                                                                                                                                             | 0.04  | 0.13 |
| K7ER74   | APOC4-APOC2 | APOC4-APOC2 readthrough (NMD candidate)                                                                                                                                        | 0.24  | 0.13 |
| P04406_2 |             | Glyceraldehyde-3-phosphate dehydrogenase (GAPDH) (EC 1.2.1.12) (Peptidyl-cysteine S-nitrosylase GAPDH) (EC 2.6.99.-)                                                           | 0.20  | 0.14 |
| B4E1Z4   |             | cDNA FLJ55673, highly similar to Complement factor B                                                                                                                           | 0.03  | 0.15 |
| P01011   | SERPI3      | Alpha-1-antichymotrypsin (ACT) (Cell growth-inhibiting gene 24/25 protein) (Serpins A3) [Cleaved into: Alpha-1-antichymotrypsin His-Pro-less]                                  | 0.13  | 0.15 |
| D6RA08   |             | Deleted.                                                                                                                                                                       | 0.12  | 0.16 |
| P00915   | CA1         | Carbonic anhydrase 1 (EC 4.2.1.1) (Carbonate dehydratase I) (Carbonic anhydrase B) (CAB) (Carbonic anhydrase I) (CA-I)                                                         | 0.10  | 0.16 |
| P02747   | C1QC        | Complement C1q subcomponent subunit C                                                                                                                                          | 0.12  | 0.16 |
| H0Y612   | TRIM33      | E3 ubiquitin-protein ligase TRIM33 (Fragment)                                                                                                                                  | 0.15  | 0.17 |
| P07359   | GP1BA       | Platelet glycoprotein Ib alpha chain (GP-Ib alpha) (GPIb-alpha) (GPIbA) (Glycoprotein Ibalph) (Antigen CD42b-alpha) (CD antigen CD42b) [Cleaved into: Glycocalicin]            | 0.06  | 0.17 |
| P02749   | APOH        | Beta-2-glycoprotein 1 (APC inhibitor) (Activated protein C-binding protein) (Anticardiolipin cofactor) (Apolipoprotein H) (Apo-H) (Beta-2-glycoprotein I) (B2GPI) (Beta(2)GPI) | -0.20 | 0.18 |
| P22792   | CPN2        | Carboxypeptidase N subunit 2 (Carboxypeptidase N 83 kDa chain) (Carboxypeptidase N large subunit) (Carboxypeptidase N polypeptide 2) (Carboxypeptidase N regulatory subunit)   | 0.04  | 0.19 |
| Q6EMK4   | VASN        | Vasorin (Protein slit-like 2)                                                                                                                                                  | 0.06  | 0.19 |
| B7ZKJ8   | ITIH4       | ITIH4 protein (Inter-alpha-trypsin inhibitor heavy chain H4)                                                                                                                   | 0.11  | 0.19 |
| O14791_3 |             | Apolipoprotein L1 (Apolipoprotein L) (Apo-L) (ApoL) (Apolipoprotein L-I) (ApoL-I)                                                                                              | 0.08  | 0.19 |
| P02649   | APOE        | Apolipoprotein E (Apo-E)                                                                                                                                                       | 0.16  | 0.19 |
| P55056   | APOC4       | Apolipoprotein C-IV (Apo-CIV) (ApoC-IV) (Apolipoprotein C4)                                                                                                                    | 0.15  | 0.19 |
| P05546   | SERPIND1    | Heparin cofactor 2 (Heparin cofactor II) (HC-II) (Protease inhibitor leuserpin-2) (HLS2) (Serpins D1)                                                                          | -0.22 | 0.19 |
| P06276   | BCHE        | Cholinesterase (EC 3.1.1.8) (Acylcholine                                                                                                                                       | -0.19 | 0.21 |

|          |          |                                                                                                                                                                                                                                                                                                                                                                                                                                                            |       |      |
|----------|----------|------------------------------------------------------------------------------------------------------------------------------------------------------------------------------------------------------------------------------------------------------------------------------------------------------------------------------------------------------------------------------------------------------------------------------------------------------------|-------|------|
|          |          | acylhydrolase) (Butyrylcholine esterase) (Choline esterase II) (Pseudocholinesterase)                                                                                                                                                                                                                                                                                                                                                                      |       |      |
| P48740   | MASP1    | Mannan-binding lectin serine protease 1 (EC 3.4.21.-) (Complement factor MASP-3) (Complement-activating component of Ra-reactive factor) (Mannose-binding lectin-associated serine protease 1) (MASP-1) (Mannose-binding protein-associated serine protease) (Ra-reactive factor serine protease p100) (RaRF) (Serine protease 5) [Cleaved into: Mannan-binding lectin serine protease 1 heavy chain; Mannan-binding lectin serine protease 1 light chain] | 0.04  | 0.23 |
| P20742   | PZP      | Pregnancy zone protein (C3 and PZP-like alpha-2-macroglobulin domain-containing protein 6)                                                                                                                                                                                                                                                                                                                                                                 | 0.12  | 0.25 |
| P02766   | TTR      | Transthyretin (ATTR) (Prealbumin) (TBPA)                                                                                                                                                                                                                                                                                                                                                                                                                   | -0.18 | 0.27 |
| P32119   | PRDX2    | Peroxiredoxin-2 (EC 1.11.1.15) (Natural killer cell-enhancing factor B) (NKEF-B) (PRP) (Thiol-specific antioxidant protein) (TSA) (Thioredoxin peroxidase 1) (Thioredoxin-dependent peroxide reductase 1)                                                                                                                                                                                                                                                  | 0.02  | 0.30 |
| P01833   | PIGR     | Polymeric immunoglobulin receptor (PIgR) (Poly-Ig receptor) (Hepatocellular carcinoma-associated protein TB6) [Cleaved into: Secretory component]                                                                                                                                                                                                                                                                                                          | 0.25  | 0.30 |
| P02745   | C1QA     | Complement C1q subcomponent subunit A                                                                                                                                                                                                                                                                                                                                                                                                                      | 0.11  | 0.31 |
| P19320_3 |          | Vascular cell adhesion protein 1 (V-CAM 1) (VCAM-1) (INCAM-100) (CD antigen CD106)                                                                                                                                                                                                                                                                                                                                                                         | 0.13  | 0.31 |
| P22352   | GPX3     | Glutathione peroxidase 3 (GPx-3) (GSHPx-3) (EC 1.11.1.9) (Extracellular glutathione peroxidase) (Plasma glutathione peroxidase) (GPx-P) (GSHPx-P)                                                                                                                                                                                                                                                                                                          | -0.07 | 0.32 |
| Q08380   | LGALS3BP | Galectin-3-binding protein (Basement membrane autoantigen p105) (Lectin galactoside-binding soluble 3-binding protein) (Mac-2-binding protein) (MAC2BP) (Mac-2 BP) (Tumor-associated antigen 90K)                                                                                                                                                                                                                                                          | 0.14  | 0.32 |
| P12259   | F5       | Coagulation factor V (Activated protein C cofactor) (Proaccelerin, labile factor) [Cleaved into: Coagulation factor V heavy chain; Coagulation factor V light chain]                                                                                                                                                                                                                                                                                       | 0.03  | 0.32 |
| P07900   | HSP90AA1 | Heat shock protein HSP 90-alpha (Heat shock 86 kDa) (HSP 86) (HSP86) (Lipopolysaccharide-associated protein 2) (LAP-2) (LPS-associated protein 2) (Renal carcinoma antigen NY-REN-38)                                                                                                                                                                                                                                                                      | 0.14  | 0.34 |
| P05452   | CLEC3B   | Tetranectin (TN) (C-type lectin domain family 3 member B) (Plasminogen kringle 4-                                                                                                                                                                                                                                                                                                                                                                          | -0.14 | 0.35 |

|           |       |                                                                                                                                                                                                                                                                                                                                                           |       |      |
|-----------|-------|-----------------------------------------------------------------------------------------------------------------------------------------------------------------------------------------------------------------------------------------------------------------------------------------------------------------------------------------------------------|-------|------|
|           |       | binding protein)                                                                                                                                                                                                                                                                                                                                          |       |      |
| P19827    | ITIH1 | Inter-alpha-trypsin inhibitor heavy chain H1 (ITI heavy chain H1) (ITI-HC1) (Inter-alpha-inhibitor heavy chain 1) (Inter-alpha-trypsin inhibitor complex component III) (Serum-derived hyaluronan-associated protein) (SHAP)                                                                                                                              | -0.13 | 0.36 |
| O43866    | CD5L  | CD5 antigen-like (Apoptosis inhibitor expressed by macrophages) (hAIM) (CT-2) (IgM-associated peptide) (SP-alpha)                                                                                                                                                                                                                                         | 0.24  | 0.37 |
| P00918    | CA2   | Carbonic anhydrase 2 (EC 4.2.1.1) (Carbonate dehydratase II) (Carbonic anhydrase C) (CAC) (Carbonic anhydrase II) (CA-II)                                                                                                                                                                                                                                 | -0.03 | 0.37 |
| P04075    | ALDOA | Fructose-bisphosphate aldolase A (EC 4.1.2.13) (Lung cancer antigen NY-LU-1) (Muscle-type aldolase)                                                                                                                                                                                                                                                       | 0.10  | 0.39 |
| P07357    | C8A   | Complement component C8 alpha chain (Complement component 8 subunit alpha)                                                                                                                                                                                                                                                                                | -0.01 | 0.39 |
| H0YD13    | CD44  | CD44 antigen                                                                                                                                                                                                                                                                                                                                              | -0.01 | 0.41 |
| P02751_10 |       | Fibronectin (FN) (Cold-insoluble globulin) (CIG) [Cleaved into: Anastellin; Ugl-Y1; Ugl-Y2; Ugl-Y3]                                                                                                                                                                                                                                                       |       | 0.41 |
| P01877    | IGHA2 | Immunoglobulin heavy constant alpha 2 (Ig alpha-2 chain C region) (Ig alpha-2 chain C region BUT) (Ig alpha-2 chain C region LAN)                                                                                                                                                                                                                         | 0.32  | 0.41 |
| P01042    | KNG1  | Kininogen-1 (Alpha-2-thiol proteinase inhibitor) (Fitzgerald factor) (High molecular weight kininogen) (HMWK) (Williams-Fitzgerald-Flaujeac factor) [Cleaved into: Kininogen-1 heavy chain; T-kinin (Ile-Ser-Bradykinin); Bradykinin (Kallidin I); Lysyl-bradykinin (Kallidin II); Kininogen-1 light chain; Low molecular weight growth-promoting factor] | -0.15 | 0.42 |
| B0YIW2    | APOC3 | Apolipoprotein C-III (Apolipoprotein C-III variant 1)                                                                                                                                                                                                                                                                                                     | 0.17  | 0.43 |
| E7EPZ9    |       | Deleted.                                                                                                                                                                                                                                                                                                                                                  | 0.05  | 0.43 |
| P04114    | APOB  | Apolipoprotein B-100 (Apo B-100) [Cleaved into: Apolipoprotein B-48 (Apo B-48)]                                                                                                                                                                                                                                                                           | 0.06  | 0.43 |
| P51884    | LUM   | Lumican (Keratan sulfate proteoglycan lumican) (KSPG lumican)                                                                                                                                                                                                                                                                                             | -0.14 | 0.43 |
| Q5VY30    | RBP4  | Retinol-binding protein                                                                                                                                                                                                                                                                                                                                   | -0.11 | 0.43 |
| Q9Y5Y7    | LYVE1 | Lymphatic vessel endothelial hyaluronic acid receptor 1 (LYVE-1) (Cell surface retention sequence-binding protein 1) (CRSBP-1) (Extracellular link domain-containing protein 1) (Hyaluronic acid receptor)                                                                                                                                                | 0.14  | 0.44 |
| P04264    | KRT1  | Keratin, type II cytoskeletal 1 (67 kDa cytokeratin) (Cytokeratin-1) (CK-1) (Hair                                                                                                                                                                                                                                                                         | 0.18  | 0.44 |

|          |          |                                                                                                                                                            |       |      |
|----------|----------|------------------------------------------------------------------------------------------------------------------------------------------------------------|-------|------|
|          |          | alpha protein) (Keratin-1) (K1) (Type-II keratin Kb1)                                                                                                      |       |      |
| P04004   | VTN      | Vitronectin (VN) (S-protein) (Serum-spreading factor) (V75) [Cleaved into: Vitronectin V65 subunit; Vitronectin V10 subunit; Somatomedin-B]                | 0.01  | 0.46 |
| C9JF17   | APOD     | Apolipoprotein D (Fragment)                                                                                                                                | -0.12 | 0.46 |
| Q16610   | ECM1     | Extracellular matrix protein 1 (Secretory component p85)                                                                                                   | 0.03  | 0.46 |
| B1AKG0   | CFHR1    | Complement factor H-related protein 1                                                                                                                      | 0.08  | 0.47 |
| P02679_2 |          | Fibrinogen gamma chain                                                                                                                                     | 0.16  | 0.48 |
| P01591   | JCHAIN   | Immunoglobulin J chain (Joining chain of multimeric IgA and IgM)                                                                                           | 0.21  | 0.49 |
| P35542   | SAA4     | Serum amyloid A-4 protein (Constitutively expressed serum amyloid A protein) (C-SAA)                                                                       | -0.07 | 0.50 |
| P02675   | FGB      | Fibrinogen beta chain [Cleaved into: Fibrinopeptide B; Fibrinogen beta chain]                                                                              | 0.15  | 0.51 |
| G3V2W1   | SERPI10  | Protein Z-dependent protease inhibitor (Serpine peptidase inhibitor, clade A (Alpha-1 antitrypsin, antitrypsin), member 10, isoform CRA_a)                 | 0.03  | 0.51 |
| P01008   | SERPINC1 | Antithrombin-III (ATIII) (Serpine C1)                                                                                                                      | -0.11 | 0.51 |
| P60709   | ACTB     | Actin, cytoplasmic 1 (Beta-actin) [Cleaved into: Actin, cytoplasmic 1, N-terminally processed]                                                             | 0.07  | 0.53 |
| P15151_3 |          | Poliovirus receptor (Nectin-like protein 5) (NECL-5) (CD antigen CD155)                                                                                    | 0.02  | 0.54 |
| P61626   | LYZ      | Lysozyme C (EC 3.2.1.17) (1,4-beta-N-acetylmuramidase C)                                                                                                   | 0.11  | 0.54 |
| V9GYE7   | CFHR2    | Complement factor H-related protein 2                                                                                                                      | 0.02  | 0.54 |
| G3XAM2   | CFI      | Complement factor I (Complement factor I, isoform CRA_b)                                                                                                   | -0.03 | 0.55 |
| P69905   | HBA1     | Hemoglobin subunit alpha (Alpha-globin) (Hemoglobin alpha chain)                                                                                           | 0.00  | 0.55 |
| P69905   | HBA2     | Hemoglobin subunit alpha (Alpha-globin) (Hemoglobin alpha chain)                                                                                           | 0.00  | 0.55 |
| O95445   | APOM     | Apolipoprotein M (Apo-M) (ApoM) (Protein G3a)                                                                                                              | -0.08 | 0.55 |
| P02790   | HPX      | Hemopexin (Beta-1B-glycoprotein)                                                                                                                           | -0.10 | 0.56 |
| P68871   | HBB      | Hemoglobin subunit beta (Beta-globin) (Hemoglobin beta chain) [Cleaved into: LVV-hemorphin-7; Spinorphin]                                                  | 0.01  | 0.60 |
| P00747   | PLG      | Plasminogen (EC 3.4.21.7) [Cleaved into: Plasmin heavy chain A; Activation peptide; Angiostatin; Plasmin heavy chain A, short form; Plasmin light chain B] | -0.09 | 0.61 |
| P00748   | F12      | Coagulation factor XII (EC 3.4.21.38) (Hageman factor) (HAF) [Cleaved into:                                                                                | 0.02  | 0.61 |

|          |       |                                                                                                                                                                                                                                                                                                                                                                                                                                                               |       |      |
|----------|-------|---------------------------------------------------------------------------------------------------------------------------------------------------------------------------------------------------------------------------------------------------------------------------------------------------------------------------------------------------------------------------------------------------------------------------------------------------------------|-------|------|
|          |       | Coagulation factor XIIa heavy chain; Beta-factor XIIa part 1; Coagulation factor XIIa light chain (Beta-factor XIIa part 2)]                                                                                                                                                                                                                                                                                                                                  |       |      |
| Q92954_4 |       | Proteoglycan 4 (Lubricin) (Megakaryocyte-stimulating factor) (Superficial zone proteoglycan) [Cleaved into: Proteoglycan 4 C-terminal part]                                                                                                                                                                                                                                                                                                                   | -0.10 | 0.61 |
| P01023   | A2M   | Alpha-2-macroglobulin (Alpha-2-M) (C3 and PZP-like alpha-2-macroglobulin domain-containing protein 5)                                                                                                                                                                                                                                                                                                                                                         | -0.06 | 0.63 |
| P06396   | GSN   | Gelsolin (AGEL) (Actin-depolymerizing factor) (ADF) (Brevin)                                                                                                                                                                                                                                                                                                                                                                                                  | -0.08 | 0.67 |
| P0DJ18   | SAA1  | Serum amyloid A-1 protein (SAA) [Cleaved into: Amyloid protein A (Amyloid fibril protein AA); Serum amyloid protein A(2-104); Serum amyloid protein A(3-104); Serum amyloid protein A(2-103); Serum amyloid protein A(2-102); Serum amyloid protein A(4-101)]                                                                                                                                                                                                 | 0.11  | 0.68 |
| P22891   | PROZ  | Vitamin K-dependent protein Z                                                                                                                                                                                                                                                                                                                                                                                                                                 | -0.05 | 0.68 |
| P27169   | PON1  | Serum paraoxonase/arylesterase 1 (PON 1) (EC 3.1.1.2) (EC 3.1.1.81) (EC 3.1.8.1) (Aromatic esterase 1) (A-esterase 1) (K-45) (Serum aryldialkylphosphatase 1)                                                                                                                                                                                                                                                                                                 | -0.17 | 0.69 |
| D6RF35   | GC    | Vitamin D-binding protein                                                                                                                                                                                                                                                                                                                                                                                                                                     | -0.09 | 0.69 |
| K7ERG9   | CFD   | Complement factor D                                                                                                                                                                                                                                                                                                                                                                                                                                           | 0.02  | 0.72 |
| P00742   | F10   | Coagulation factor X (EC 3.4.21.6) (Stuart factor) (Stuart-Prower factor) [Cleaved into: Factor X light chain; Factor X heavy chain; Activated factor Xa heavy chain]                                                                                                                                                                                                                                                                                         | 0.03  | 0.72 |
| P01024   | C3    | Complement C3 (C3 and PZP-like alpha-2-macroglobulin domain-containing protein 1) [Cleaved into: Complement C3 beta chain; C3-beta-c (C3bc); Complement C3 alpha chain; C3a anaphylatoxin; Acylation stimulating protein (ASP) (C3adesArg); Complement C3b alpha' chain; Complement C3c alpha' chain fragment 1; Complement C3dg fragment; Complement C3g fragment; Complement C3d fragment; Complement C3f fragment; Complement C3c alpha' chain fragment 2] | -0.08 | 0.72 |
| P01861   | IGHG4 | Immunoglobulin heavy constant gamma 4 (Ig gamma-4 chain C region)                                                                                                                                                                                                                                                                                                                                                                                             | 0.06  | 0.72 |
| P02042   | HBD   | Hemoglobin subunit delta (Delta-globin) (Hemoglobin delta chain)                                                                                                                                                                                                                                                                                                                                                                                              | -0.03 | 0.72 |
| P02760   | AMBP  | Protein AMBP [Cleaved into: Alpha-1-microglobulin (Protein HC) (Alpha-1 microglycoprotein) (Complex-forming glycoprotein heterogeneous in charge); Inter-                                                                                                                                                                                                                                                                                                     | -0.10 | 0.72 |

|          |          |                                                                                                                                                                                                                                                     |       |      |
|----------|----------|-----------------------------------------------------------------------------------------------------------------------------------------------------------------------------------------------------------------------------------------------------|-------|------|
|          |          | alpha-trypsin inhibitor light chain (ITI-LC) (Bikunin) (EDC1) (HI-30) (Uronic-acid-rich protein); Trypstatin]                                                                                                                                       |       |      |
| P02765   | AHSG     | Alpha-2-HS-glycoprotein (Alpha-2-Z-globulin) (Ba-alpha-2-glycoprotein) (Fetuin-A) [Cleaved into: Alpha-2-HS-glycoprotein chain A; Alpha-2-HS-glycoprotein chain B]                                                                                  | -0.07 | 0.72 |
| P08185   | SERPI6   | Corticosteroid-binding globulin (CBG) (Serpins A6) (Transcortin)                                                                                                                                                                                    | 0.00  | 0.72 |
| P0C0L5   | C4B      | Complement C4-B (Basic complement C4) (C3 and PZP-like alpha-2-macroglobulin domain-containing protein 3) [Cleaved into: Complement C4 beta chain; Complement C4-B alpha chain; C4a anaphylatoxin; C4b-B; C4d-B; Complement C4 gamma chain]         | -0.01 | 0.72 |
| P0C0L5   | C4B_2    | Complement C4-B (Basic complement C4) (C3 and PZP-like alpha-2-macroglobulin domain-containing protein 3) [Cleaved into: Complement C4 beta chain; Complement C4-B alpha chain; C4a anaphylatoxin; C4b-B; C4d-B; Complement C4 gamma chain]         | -0.01 | 0.72 |
| Q9UGM5   | FETUB    | Fetuin-B (16G2) (Fetuin-like protein IRL685) (Gugu)                                                                                                                                                                                                 | -0.12 | 0.72 |
| B4E2S7   |          | cDNA FLJ58780, highly similar to Homo sapiens lysosomal-associated membrane protein 2 (LAMP2), transcript variant LAMP2B, mRNA                                                                                                                      | 0.00  | 0.74 |
| E9PFZ2   | CP       | Ceruloplasmin                                                                                                                                                                                                                                       | 0.11  | 0.74 |
| F5GXS5   |          | Deleted.                                                                                                                                                                                                                                            | 0.04  | 0.74 |
| P14151   | SELL     | L-selectin (CD62 antigen-like family member L) (Leukocyte adhesion molecule 1) (LAM-1) (Leukocyte surface antigen Leu-8) (Leukocyte-endothelial cell adhesion molecule 1) (LECAM1) (Lymph node homing receptor) (TQ1) (gp90-MEL) (CD antigen CD62L) | 0.01  | 0.74 |
| P36955   | SERPINF1 | Pigment epithelium-derived factor (PEDF) (Cell proliferation-inducing gene 35 protein) (EPC-1) (Serpins F1)                                                                                                                                         | 0.00  | 0.74 |
| Q04756   | HGFAC    | Hepatocyte growth factor activator (HGF activator) (HGFA) (EC 3.4.21.-) [Cleaved into: Hepatocyte growth factor activator short chain; Hepatocyte growth factor activator long chain]                                                               | -0.02 | 0.74 |
| P05543   | SERPI7   | Thyroxine-binding globulin (Serpins A7) (T4-binding globulin)                                                                                                                                                                                       | -0.08 | 0.77 |
| F8W1Q3   |          | Biotinidase (Biotinase) (EC 3.5.1.12)                                                                                                                                                                                                               | -0.01 | 0.78 |
| O75882_3 |          | Attractin (DPPT-L) (Mahogany homolog)                                                                                                                                                                                                               | -0.02 | 0.78 |
| P05155   | SERPING  | Plasma protease C1 inhibitor (C1 Inh)                                                                                                                                                                                                               | 0.02  | 0.78 |



|          |       |                                                                                                                                                                                                                                                                                                                                                                                                                                                                                                                                                                                                                                                          |       |      |
|----------|-------|----------------------------------------------------------------------------------------------------------------------------------------------------------------------------------------------------------------------------------------------------------------------------------------------------------------------------------------------------------------------------------------------------------------------------------------------------------------------------------------------------------------------------------------------------------------------------------------------------------------------------------------------------------|-------|------|
|          | 1     | (C1Inh) (C1 esterase inhibitor) (C1-inhibiting factor) (Serpin G1)                                                                                                                                                                                                                                                                                                                                                                                                                                                                                                                                                                                       |       |      |
| Q96IY4   | CPB2  | Carboxypeptidase B2 (EC 3.4.17.20) (Carboxypeptidase U) (CPU) (Plasma carboxypeptidase B) (pCPB) (Thrombin-activable fibrinolysis inhibitor) (TAFI)                                                                                                                                                                                                                                                                                                                                                                                                                                                                                                      | -0.04 | 0.78 |
| P07996   | THBS1 | Thrombospondin-1 (Glycoprotein G)                                                                                                                                                                                                                                                                                                                                                                                                                                                                                                                                                                                                                        | -0.08 | 0.79 |
| P08603   | CFH   | Complement factor H (H factor 1)                                                                                                                                                                                                                                                                                                                                                                                                                                                                                                                                                                                                                         | 0.01  | 0.79 |
| P10909_4 |       | Clusterin (Aging-associated gene 4 protein) (Apolipoprotein J) (Apo-J) (Complement cytolysis inhibitor) (CLI) (Complement-associated protein SP-40,40) (Ku70-binding protein 1) (NA1/NA2) (Sulfated glycoprotein 2) (SGP-2) (Testosterone-repressed prostate message 2) (TRPM-2) [Cleaved into: Clusterin beta chain (ApoJalpha) (Complement cytolysis inhibitor a chain); Clusterin alpha chain (ApoJbeta) (Complement cytolysis inhibitor b chain)]                                                                                                                                                                                                    | -0.04 | 0.82 |
| I3L145   | SHBG  | Sex hormone-binding globulin (Sex hormone-binding globulin, isoform CRA_a)                                                                                                                                                                                                                                                                                                                                                                                                                                                                                                                                                                               | -0.08 | 0.83 |
| K7ERI9   | APOC1 | Apolipoprotein C-I (Fragment)                                                                                                                                                                                                                                                                                                                                                                                                                                                                                                                                                                                                                            | 0.09  | 0.83 |
| P00736   | C1R   | Complement C1r subcomponent (EC 3.4.21.41) (Complement component 1 subcomponent r) [Cleaved into: Complement C1r subcomponent heavy chain; Complement C1r subcomponent light chain]                                                                                                                                                                                                                                                                                                                                                                                                                                                                      | -0.05 | 0.83 |
| P02775   | PPBP  | Platelet basic protein (PBP) (C-X-C motif chemokine 7) (Leukocyte-derived growth factor) (LDGF) (Macrophage-derived growth factor) (MDGF) (Small-inducible cytokine B7) [Cleaved into: Connective tissue-activating peptide III (CTAP-III) (LA-PF4) (Low-affinity platelet factor IV); TC-2; Connective tissue-activating peptide III(1-81) (CTAP-III(1-81)); Beta-thromboglobulin (Beta-TG); Neutrophil-activating peptide 2(74) (NAP-2(74)); Neutrophil-activating peptide 2(73) (NAP-2(73)); Neutrophil-activating peptide 2 (NAP-2); TC-1; Neutrophil-activating peptide 2(1-66) (NAP-2(1-66)); Neutrophil-activating peptide 2(1-63) (NAP-2(1-63))] | -0.08 | 0.83 |
| Q13103   | SPP2  | Secreted phosphoprotein 24 (Spp-24) (Secreted phosphoprotein 2)                                                                                                                                                                                                                                                                                                                                                                                                                                                                                                                                                                                          | -0.02 | 0.83 |
| P0COL4   | C4A   | Complement C4-A (Acidic complement C4) (C3 and PZP-like alpha-2-macroglobulin domain-containing protein 2) [Cleaved into: Complement C4 beta chain; Complement C4-A alpha chain; C4a anaphylatoxin; C4b-A;                                                                                                                                                                                                                                                                                                                                                                                                                                               | 0.02  | 0.84 |

|          |          |                                                                                                                                                                                                                                                                                           |       |      |
|----------|----------|-------------------------------------------------------------------------------------------------------------------------------------------------------------------------------------------------------------------------------------------------------------------------------------------|-------|------|
|          |          | C4d-A; Complement C4 gamma chain]                                                                                                                                                                                                                                                         |       |      |
| E9PGP2   |          | Deleted.                                                                                                                                                                                                                                                                                  | 0.03  | 0.85 |
| P15169   | CPN1     | Carboxypeptidase N catalytic chain (CPN) (EC 3.4.17.3) (Anaphylatoxin inactivator) (Arginine carboxypeptidase) (Carboxypeptidase N polypeptide 1) (Carboxypeptidase N small subunit) (Kininase-1) (Lysine carboxypeptidase) (Plasma carboxypeptidase B) (Serum carboxypeptidase N) (SCPN) | -0.01 | 0.85 |
| P08697   | SERPINF2 | Alpha-2-antiplasmin (Alpha-2-AP) (Alpha-2-plasmin inhibitor) (Alpha-2-PI) (Serpins F2)                                                                                                                                                                                                    | 0.01  | 0.85 |
| H0YAC1   | KLKB1    | Plasma kallikrein (Fragment)                                                                                                                                                                                                                                                              | -0.04 | 0.90 |
| P00740_2 |          | Coagulation factor IX (EC 3.4.21.22) (Christmas factor) (Plasma thromboplastin component) (PTC) [Cleaved into: Coagulation factor IXa light chain; Coagulation factor IXa heavy chain]                                                                                                    | -0.01 | 0.90 |
| P04180   | LCAT     | Phosphatidylcholine-sterol acyltransferase (EC 2.3.1.43) (Lecithin-cholesterol acyltransferase) (Phospholipid-cholesterol acyltransferase)                                                                                                                                                | -0.01 | 0.90 |
| P00739   | HPR      | Haptoglobin-related protein                                                                                                                                                                                                                                                               | 0.03  | 0.93 |
| P02743   | APCS     | Serum amyloid P-component (SAP) (9.5S alpha-1-glycoprotein) [Cleaved into: Serum amyloid P-component(1-203)]                                                                                                                                                                              | 0.03  | 0.94 |
| P09871   | C1S      | Complement C1s subcomponent (EC 3.4.21.42) (C1 esterase) (Complement component 1 subcomponent s) [Cleaved into: Complement C1s subcomponent heavy chain; Complement C1s subcomponent light chain]                                                                                         | -0.08 | 1.00 |
| P00450   | CP       | Ceruloplasmin (EC 1.16.3.1) (Ferroxidase)                                                                                                                                                                                                                                                 | -0.05 | 1.00 |
| P00734   | F2       | Prothrombin (EC 3.4.21.5) (Coagulation factor II) [Cleaved into: Activation peptide fragment 1; Activation peptide fragment 2; Thrombin light chain; Thrombin heavy chain]                                                                                                                | -0.05 | 1.00 |
| P02774   | GC       | Vitamin D-binding protein (DBP) (VDB) (Gc protein-derived macrophage activating factor) (Gc-MAF) (GcMAF) (Gc-globulin) (Group-specific component) (Gc) (Vitamin D-binding protein-macrophage activating factor) (DBP-maf)                                                                 | -0.06 | 1.00 |
| P04217   | A1BG     | Alpha-1B-glycoprotein (Alpha-1-B glycoprotein)                                                                                                                                                                                                                                            | -0.02 | 1.00 |
| P06727   | APOA4    | Apolipoprotein A-IV (Apo-AIV) (ApoA-IV) (Apolipoprotein A4)                                                                                                                                                                                                                               | 0.00  | 1.00 |
| P13671   | C6       | Complement component C6                                                                                                                                                                                                                                                                   | -0.05 | 1.00 |
| P43652   | AFM      | Afamin (Alpha-albumin) (Alpha-Alb)                                                                                                                                                                                                                                                        | -0.07 | 1.00 |
| P69891   | HBG1     | Hemoglobin subunit gamma-1 (Gamma-1-                                                                                                                                                                                                                                                      | -0.07 | 1.00 |

|  |  |                                                                             |  |  |
|--|--|-----------------------------------------------------------------------------|--|--|
|  |  | globin) (Hb F Agamma) (Hemoglobin gamma-1 chain) (Hemoglobin gamma-A chain) |  |  |
|--|--|-----------------------------------------------------------------------------|--|--|

686 \*log fold change - positive value for log fold change indicate higher enrichment in HIV(+);  
687 °false-discovery rate adjusted after logistic regression using inverse probability weighting  
688 accounting for recruitment site, sex , age, HIV status, mid-upper arm circumference, and  
689 presence of oedema

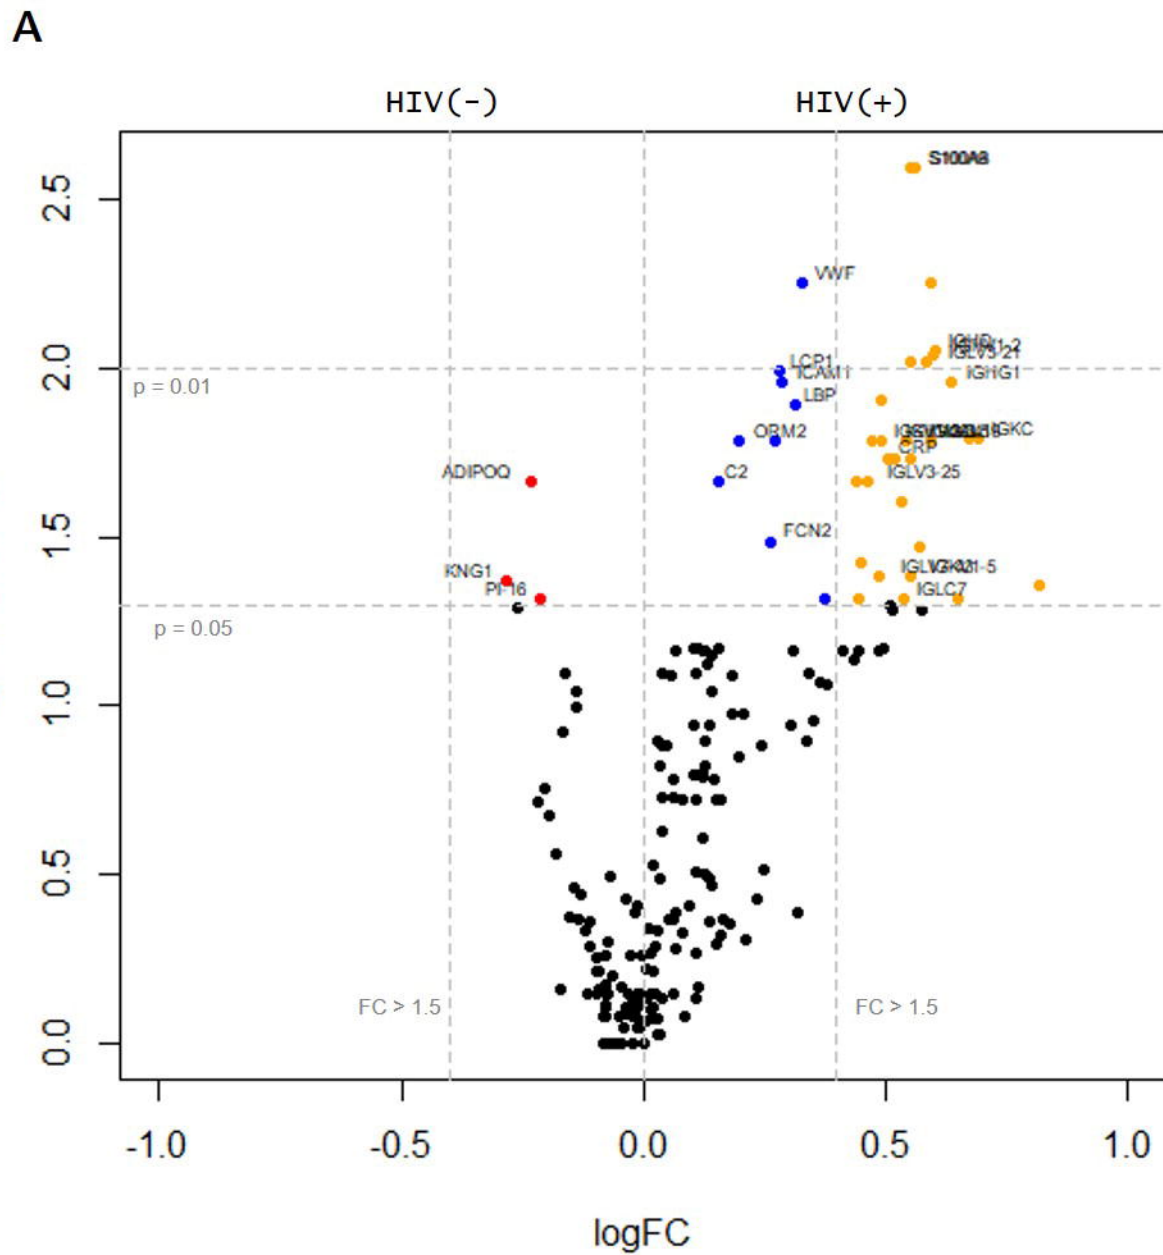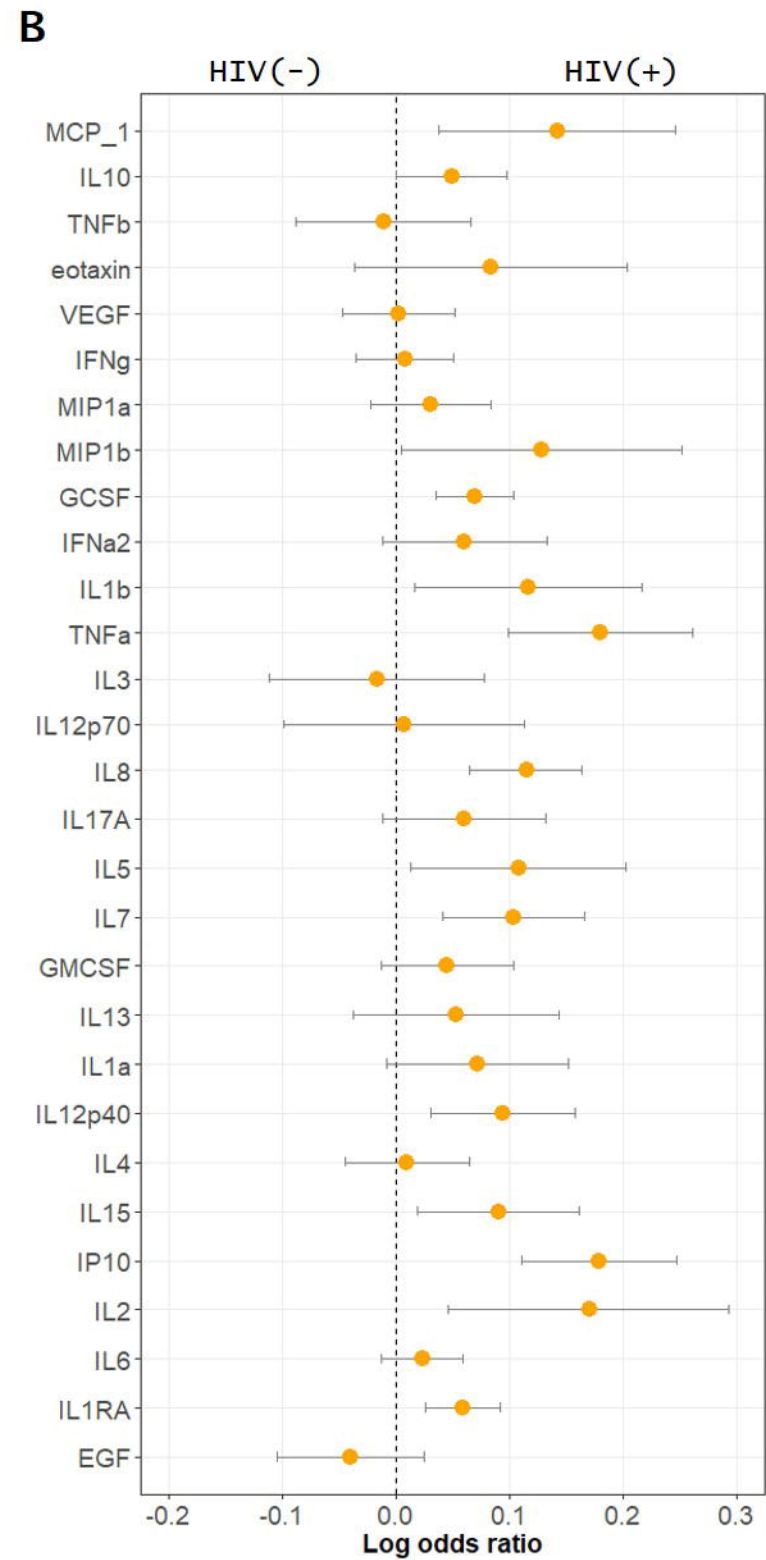

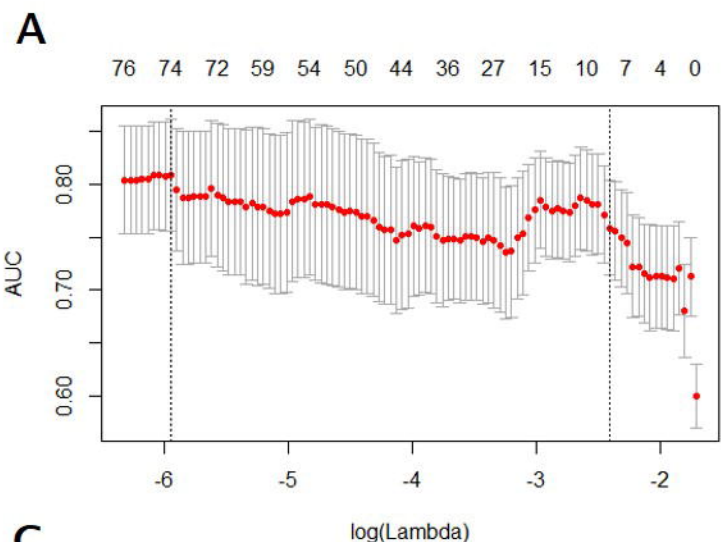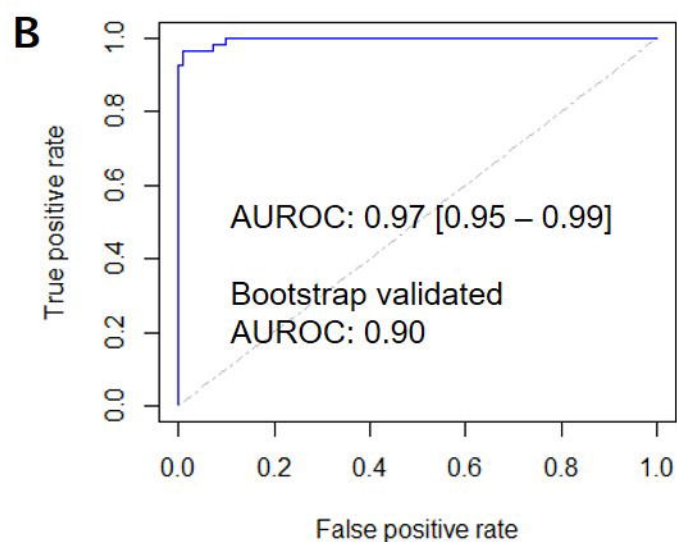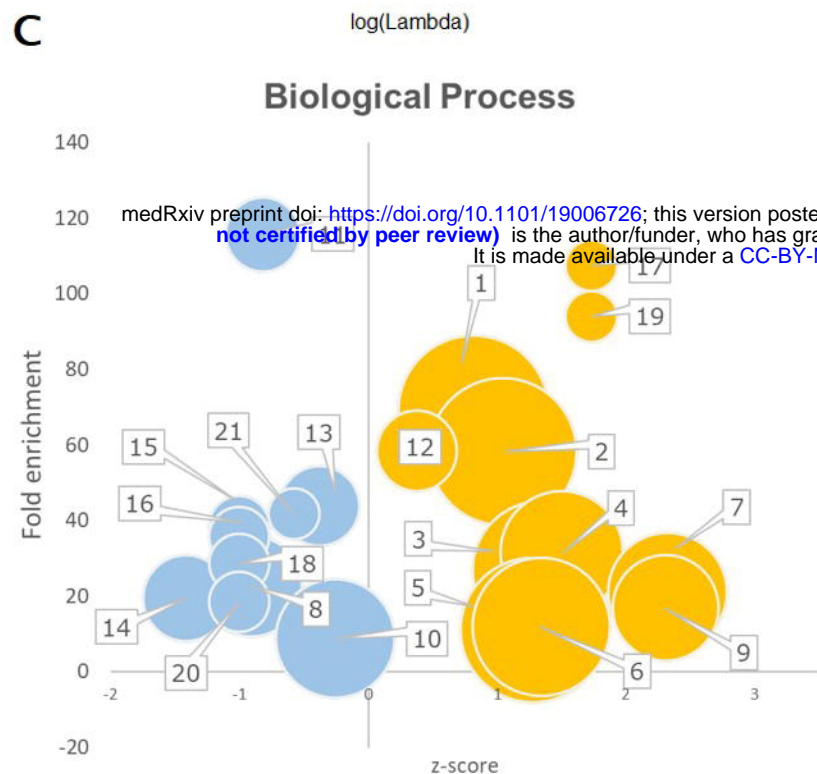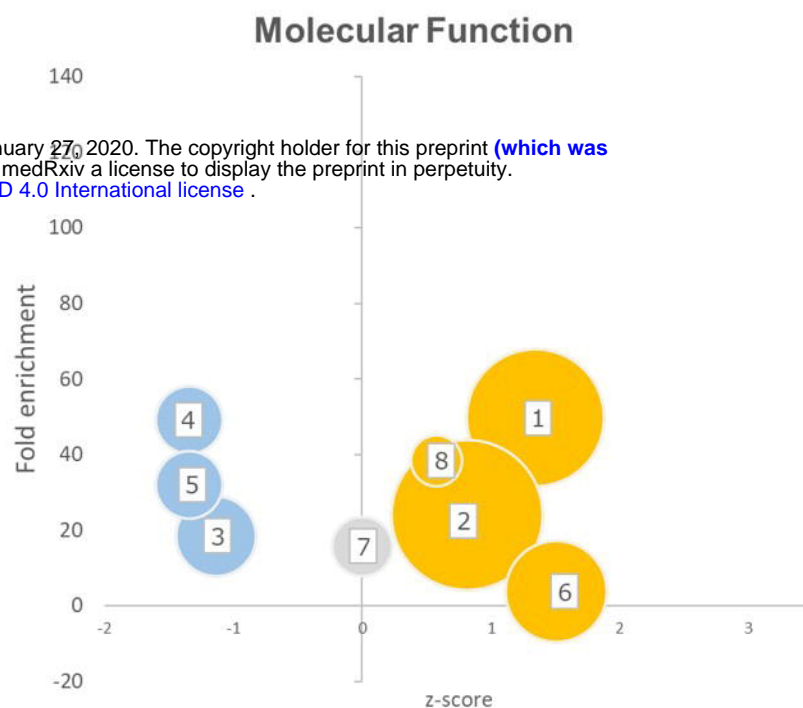

| Code | Pathway                                                       |
|------|---------------------------------------------------------------|
| 1    | complement activation                                         |
| 2    | complement activation, classical pathway                      |
| 3    | receptor-mediated endocytosis                                 |
| 4    | Fc-gamma receptor signalling pathway involved in phagocytosis |
| 5    | Proteolysis                                                   |
| 6    | immune response                                               |
| 7    | regulation of immune response                                 |
| 8    | negative regulation of endopeptidase activity                 |
| 9    | Fc-epsilon receptor signalling pathway                        |
| 10   | innate immune response                                        |
| 11   | complement activation, alternative pathway                    |
| 12   | regulation of complement activation                           |
| 13   | retina homeostasis                                            |
| 14   | platelet degranulation                                        |
| 15   | positive regulation of B cell activation                      |
| 16   | phagocytosis, recognition                                     |
| 17   | complement activation, lectin pathway                         |
| 18   | phagocytosis, engulfment                                      |
| 19   | very-low-density lipoprotein particle assembly                |
| 20   | B cell receptor signaling pathway                             |
| 21   | blood coagulation, intrinsic pathway                          |

| Code | Pathway                                      |
|------|----------------------------------------------|
| 1    | antigen binding                              |
| 2    | serine-type endopeptidase activity           |
| 3    | serine-type endopeptidase inhibitor activity |
| 4    | immunoglobulin receptor binding              |
| 5    | endopeptidase inhibitor activity             |
| 6    | identical protein binding                    |
| 7    | glycoprotein binding                         |
| 8    | lipid transporter activity                   |

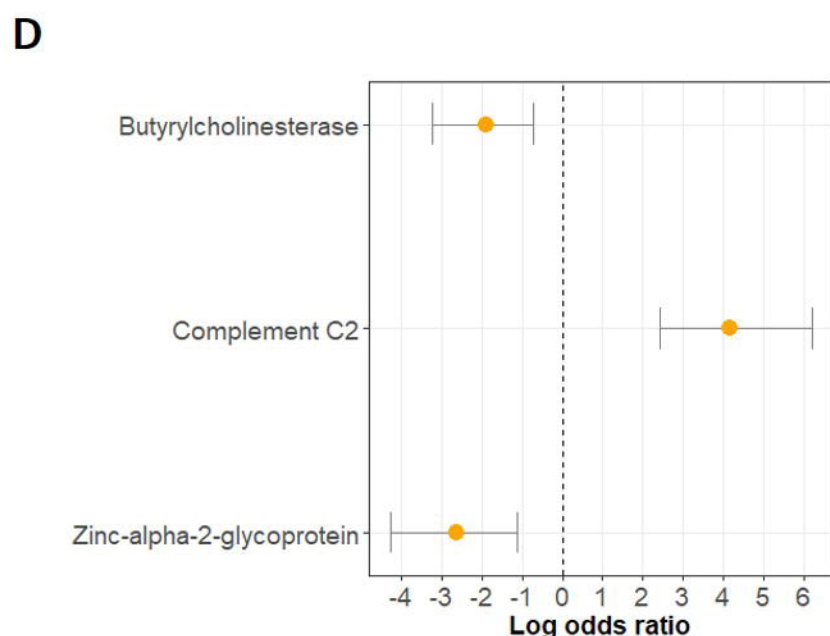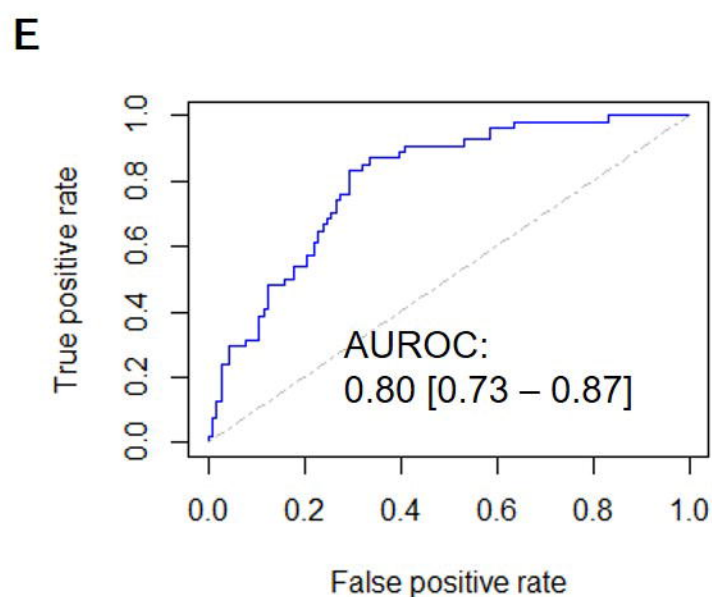

Source: https://medrxiv.org/content/medrxiv/early/2020/01/27/19006726.full.pdf
